# Supplementary material for: Contraceptive service provider imposed restrictions to contraceptive access in urban Nigeria
Source: PubMed Central journal article supplement (PMC5389090; doi:10.1186/s12913-017-2233-0), 2017-04-12
Supplement: 12913_2017_2233_MOESM1_ESM.pdf [file 12913_2017_2233_MOESM1_ESM.pdf]

| IDENTIFICATION                                                                |                                                                                  |                                                                             |
|-------------------------------------------------------------------------------|----------------------------------------------------------------------------------|-----------------------------------------------------------------------------|
| SUPERVISOR<br>NAME _____<br>CODE [ ] [ ]<br>DATE [ ] / [ ] / 11 ]<br>DD MM YY | OFFICE EDITOR<br>NAME _____<br>CODE [ ] [ ]<br>DATE [ ] / [ ] / 11 ]<br>DD MM YY | KEYED BY<br>NAME _____<br>CODE [ ] [ ]<br>DATE [ ] / [ ] / 11 ]<br>DD MM YY |

| BACKGROUND INFORMATION |                                                                     |                                                                                                                                                                                                                                                                                                                                                  |      |
|------------------------|---------------------------------------------------------------------|--------------------------------------------------------------------------------------------------------------------------------------------------------------------------------------------------------------------------------------------------------------------------------------------------------------------------------------------------|------|
| Source                 | Questions                                                           | Coding                                                                                                                                                                                                                                                                                                                                           | Skip |
| Q1.                    | RECORD THE TIME<br><br>(IN 24 HOUR FORMAT)                          | Hour ..... [ ] [ ]      Minutes ..... [ ] [ ]                                                                                                                                                                                                                                                                                                    |      |
| Q2.                    | SEX OF PROVIDER INTERVIEWED                                         | MALE.....1<br>FEMALE.....2                                                                                                                                                                                                                                                                                                                       |      |
| Q3.                    | How long have you been working here at this facility?               | YEARS... [ ] [ ]<br><br>LESS THAN ONE YEAR =00<br>DON'T KNOW = 98                                                                                                                                                                                                                                                                                |      |
| Q4.                    | What cadre of staff are you?                                        | OBSTETRICIAN/GYNECOLOGIST.....01<br>GENERAL SURGEON.....02<br>PEDIATRICIAN.....03<br>GENERAL PHYSICIAN.....04<br>THEATRE NURSE.....05<br>NURSE/MIDWIFE.....06<br>NURSE.....07<br>MIDWIFE.....08<br>COMMUNITY HEALTH EXTENSION WORKER (CHEW)...09<br>COMMUNITY HEALTH OFFICER (CHO).....10<br>VCT COUNSELOR.....11<br>OTHER _____ 96<br>(SPECIFY) |      |
| Q5.                    | How old were you at your last birthday?                             | YEARS..... [ ] [ ]                                                                                                                                                                                                                                                                                                                               |      |
| Q6.                    | What is your religion?                                              | CHRISTIAN-CATHOLIC.....01<br>CHRISTIAN-PROTESTANT/OTHER CHRISTIAN.....02<br>ISLAM.....03<br>TRADITIONAL.....04<br>NO RELIGION .....05<br><br>OTHER _____ 06<br>(SPECIFY)                                                                                                                                                                         |      |
| Q7.                    | In which department or unit do you work?                            | GENERAL OUTPATIENT DEPARTMENT (GOPD) ... 01<br>OBSTETRICS AND GYNCOLOGY ..... 02<br>SURGERY .....03<br>PEDIATRICS .....04<br>FAMILY PLANNING DEPARTMENT .....05<br>INFANT AND CHILD CARE .....06<br>ANC.....07<br>HIV TESTING OR STI/HIV TREATMENT.....08<br>Other _____ 96<br>(SPECIFY)                                                         |      |
| Q8.                    | How many years have you been working as a health care provider?     | NUMBER OF YEARS: [ ] [ ]                                                                                                                                                                                                                                                                                                                         |      |
| Q9.                    | How many years ago did you finish your <b>pre-service</b> training? | YEARS AGO..... [ ] [ ]<br><br>LESS THAN ONE YEAR = 00<br>NO PRE-SERVICE TRAINING=97                                                                                                                                                                                                                                                              |      |

|      |                                                                                         |                                                                                                                   |
|------|-----------------------------------------------------------------------------------------|-------------------------------------------------------------------------------------------------------------------|
| Q10. | Have you received any <b>in-service</b> training on family planning?                    | YES.....1<br>NO.....2 → Q12a                                                                                      |
| Q11. | How long ago was the last <b>in-service</b> family planning training that you attended? | DAYS AGO.....1 [ ] [ ]<br>WEEKS AGO.....2 [ ] [ ]<br>MONTHS AGO.....3<br>YEARS AGO.....4<br>DON'T REMEMBER....998 |

**TRAINING ON FAMILY PLANNING**  
 Now, I will ask you few questions related to training on FP.

**CHECK Q09 AND Q10 ON PRE-SERVICE AND IN-SERVICE TRAINING:**

**HAS HAD BOTH PRE AND IN-SERVICE TRAINING**  → Q12b  
 (Q9=00 OR HIGHER AND Q10=1)  
**THEN ANSWER Q12a-Q12d**

**HAS HAD IN-SERVICE TRAINING ONLY**  → Q12b  
 (Q9=97 AND Q10=1)

**HAS HAD PRE-SERVICE TRAINING ONLY**  → Q13  
 (Q9=00 OR GREATER AND Q10=2)  
**THEN ANSWER 12a ONLY**

**HAS NOT HAD ANY PRE OR IN SERVICE TRAINING**  → Q13  
 (Q9=97 AND Q10=2)

| TOPICS                                                          | Q12a. Did your <b>pre-service</b> training cover TOPIC? | Q12b. Have you ever attended an <b>in-service</b> training on TOPIC? | Q12c. What year was your most recent <b>in-service</b> training on TOPIC? | Q12d. Which organization or government ministry conducted this training?<br><br>LIST NAME OF ORGANIZATION. |
|-----------------------------------------------------------------|---------------------------------------------------------|----------------------------------------------------------------------|---------------------------------------------------------------------------|------------------------------------------------------------------------------------------------------------|
| (01) Contraceptive technology update                            | YES ..... 1<br>NO ..... 2<br>DK.....8                   | YES ..... 1<br>NO ..... 2 →(02)                                      | [ ] [ ] [ ] [ ]<br>DK=9998                                                | [ ] [ ] [ ] [ ]<br>_____                                                                                   |
| (02) Exclusive breastfeeding counseling/LAM                     | YES ..... 1<br>NO ..... 2<br>DK.....8                   | YES ..... 1<br>NO ..... 2 →(03)                                      | [ ] [ ] [ ] [ ]<br>DK=9998                                                | [ ] [ ] [ ] [ ]<br>_____                                                                                   |
| (03) Natural family planning (rhythm method, cycle beads, etc.) | YES ..... 1<br>NO ..... 2<br>DK.....8                   | YES ..... 1<br>NO ..... 2 →(04)                                      | [ ] [ ] [ ] [ ]<br>DK=9998                                                | [ ] [ ] [ ] [ ]<br>_____                                                                                   |
| (04) Emergency Contraceptive                                    | YES ..... 1<br>NO ..... 2<br>DK.....8                   | YES ..... 1<br>NO ..... 2 →(05)                                      | [ ] [ ] [ ] [ ]<br>DK=9998                                                | [ ] [ ] [ ] [ ]<br>_____                                                                                   |
| (05) Oral pills                                                 | YES ..... 1<br>NO ..... 2<br>DK.....8                   | YES ..... 1<br>NO ..... 2 →(06)                                      | [ ] [ ] [ ] [ ]<br>DK=9998                                                | [ ] [ ] [ ] [ ]<br>_____                                                                                   |
| (06) FP counseling skills                                       | YES ..... 1<br>NO ..... 2<br>DK.....8                   | YES ..... 1<br>NO ..... 2 →(07)                                      | [ ] [ ] [ ] [ ]<br>DK=9998                                                | [ ] [ ] [ ] [ ]<br>_____                                                                                   |
| (07) Clinical skills on IUD                                     | YES ..... 1<br>NO ..... 2<br>DK.....8                   | YES ..... 1<br>NO ..... 2 →(08)                                      | [ ] [ ] [ ] [ ]<br>DK=9998                                                | [ ] [ ] [ ] [ ]<br>_____                                                                                   |
| (08) Clinical skills on injectable contraceptive                | YES ..... 1<br>NO ..... 2<br>DK.....8                   | YES ..... 1<br>NO ..... 2 →(09)                                      | [ ] [ ] [ ] [ ]<br>DK=9998                                                | [ ] [ ] [ ] [ ]<br>_____                                                                                   |
| (09) Clinical skills on implant                                 | YES ..... 1<br>NO ..... 2<br>DK.....8                   | YES ..... 1<br>NO ..... 2 →(10)                                      | [ ] [ ] [ ] [ ]<br>DK=9998                                                | [ ] [ ] [ ] [ ]<br>_____                                                                                   |

| TOPICS |                                                        | Q12a. Did your <b>pre-service</b> training cover TOPIC? | Q12b. Have you ever attended an <b>in-service</b> training on TOPIC? | Q12c. What year was your most recent <b>in-service</b> training on TOPIC? | Q12d. Which organization or government ministry conducted this training?<br><br>LIST NAME OF ORGANIZATION. |
|--------|--------------------------------------------------------|---------------------------------------------------------|----------------------------------------------------------------------|---------------------------------------------------------------------------|------------------------------------------------------------------------------------------------------------|
| (10)   | Clinical skills on Female Sterilization                | YES ..... 1<br>NO ..... 2<br>DK ..... 8                 | YES ..... 1<br>NO ..... 2 →(11)                                      | [ ] [ ] [ ] [ ] [ ]<br>DK=9998                                            | _____<br> _ _ _                                                                                            |
| (11)   | Clinical skills on male sterilization                  | YES ..... 1<br>NO ..... 2<br>DK ..... 8                 | YES ..... 1<br>NO ..... 2 →(12)                                      | [ ] [ ] [ ] [ ] [ ]<br>DK=9998                                            | _____<br> _ _ _                                                                                            |
| (12)   | Management of incomplete abortion (Post-Abortion Care) | YES ..... 1<br>NO ..... 2<br>DK ..... 8                 | YES ..... 1<br>NO ..... 2 →(13)                                      | [ ] [ ] [ ] [ ] [ ]<br>DK=9998                                            | _____<br> _ _ _                                                                                            |
| (13)   | Manual vacuum aspiration (MVA)                         | YES ..... 1<br>NO ..... 2<br>DK ..... 8                 | YES ..... 1<br>NO ..... 2 →(14)                                      | [ ] [ ] [ ] [ ] [ ]<br>DK=9998                                            | _____<br> _ _ _                                                                                            |

| <b>Now I would like to ask you some questions about your knowledge and provision of various methods of family planning. If you have provided a particular method before, we are also interested in the availability and quality of the materials required to provide that method.</b> |                                                                                                                                                                                                                                                                                                                                                                                                           |                                                                              |                                                                                                                           |                                                                                                                                 |                                                                                                          |                                                                                                                    |
|---------------------------------------------------------------------------------------------------------------------------------------------------------------------------------------------------------------------------------------------------------------------------------------|-----------------------------------------------------------------------------------------------------------------------------------------------------------------------------------------------------------------------------------------------------------------------------------------------------------------------------------------------------------------------------------------------------------|------------------------------------------------------------------------------|---------------------------------------------------------------------------------------------------------------------------|---------------------------------------------------------------------------------------------------------------------------------|----------------------------------------------------------------------------------------------------------|--------------------------------------------------------------------------------------------------------------------|
| METHOD                                                                                                                                                                                                                                                                                | 13a. Can you please tell me which of the following best describes your knowledge of [METHOD]:<br>1. You know METHOD sufficiently well to counsel and provide/assist in provision to a client;<br>2. You know METHOD sufficiently well to counsel, but not to provide;<br>3. You know little about METHOD and would not feel comfortable counseling or providing;<br>8. You know do not know METHOD at all | 13b. Have you provided (assisted with) [METHOD] to clients at this facility? | 13c. Have you experienced any stockouts in this facility that lasted more than 24 hours of [METHOD] in the last one year? | 13d. If yes, how many total days of stockouts did this facility have in the last ONE YEAR of [METHOD] (all stockouts combined)? | 13e. Have you experienced a lack of essential equipment needed to provide [METHOD] in the last ONE YEAR? | 13f. If Yes, how many total days did you lack essential equipment needed to provide [METHOD] in the last ONE YEAR? |
| (01) Combined oral pill                                                                                                                                                                                                                                                               | PROVIDE & COUNSEL.....1<br>COUNSEL, NOT PROVIDE.....2<br>KNOW LITTLE ABOUT.....3 } (02)<br>DO NOT KNOW.....8                                                                                                                                                                                                                                                                                              | YES.....1<br>NO.....2 → (02)                                                 | YES.....1<br>NO.....2 → (02)<br>PRESCRIPTION ONLY.....3 → (02)                                                            | DAYS...<br><input type="text"/> <input type="text"/> <input type="text"/><br><br>CONSTANT PROBLEM...995<br><br>DON'T KNOW..998  |                                                                                                          |                                                                                                                    |
| (02) Progestin-only pill                                                                                                                                                                                                                                                              | PROVIDE & COUNSEL.....1<br>COUNSEL, NOT PROVIDE.....2<br>KNOW LITTLE ABOUT.....3 } (03)<br>DO NOT KNOW.....8                                                                                                                                                                                                                                                                                              | YES.....1<br>NO.....2 → (03)                                                 | YES.....1<br>NO.....2 → (03)<br>PRESCRIPTION ONLY.....3 → (03)                                                            | DAYS...<br><input type="text"/> <input type="text"/> <input type="text"/><br><br>CONSTANT PROBLEM...995<br><br>DON'T KNOW..998  |                                                                                                          |                                                                                                                    |
| (03) Injectables                                                                                                                                                                                                                                                                      | PROVIDE & COUNSEL.....1<br>COUNSEL, NOT PROVIDE.....2<br>KNOW LITTLE ABOUT.....3 } (04)<br>DO NOT KNOW.....8                                                                                                                                                                                                                                                                                              | YES.....1<br>NO.....2 → (04)                                                 | YES.....1<br>NO.....2 → (04)<br>PRESCRIPTION ONLY.....3 → (04)                                                            | DAYS...<br><input type="text"/> <input type="text"/> <input type="text"/><br><br>CONSTANT PROBLEM...995<br><br>DON'T KNOW..998  |                                                                                                          |                                                                                                                    |

| Now I would like to ask you some questions about your knowledge and provision of various methods of family planning. If you have provided a particular method before, we are also interested in the availability and quality of the materials required to provide that method. |                                                                                                                                                                                                                                                                                                                                                                                                           |                                                                              |                                                                                                                           |                                                                                                                                 |                                                                                                          |                                                                                                                    |
|--------------------------------------------------------------------------------------------------------------------------------------------------------------------------------------------------------------------------------------------------------------------------------|-----------------------------------------------------------------------------------------------------------------------------------------------------------------------------------------------------------------------------------------------------------------------------------------------------------------------------------------------------------------------------------------------------------|------------------------------------------------------------------------------|---------------------------------------------------------------------------------------------------------------------------|---------------------------------------------------------------------------------------------------------------------------------|----------------------------------------------------------------------------------------------------------|--------------------------------------------------------------------------------------------------------------------|
| METHOD                                                                                                                                                                                                                                                                         | 13a. Can you please tell me which of the following best describes your knowledge of [METHOD]:<br>1. You know METHOD sufficiently well to counsel and provide/assist in provision to a client;<br>2. You know METHOD sufficiently well to counsel, but not to provide;<br>3. You know little about METHOD and would not feel comfortable counseling or providing;<br>8. You know do not know METHOD at all | 13b. Have you provided (assisted with) [METHOD] to clients at this facility? | 13c. Have you experienced any stockouts in this facility that lasted more than 24 hours of [METHOD] in the last one year? | 13d. If yes, how many total days of stockouts did this facility have in the last ONE YEAR of [METHOD] (all stockouts combined)? | 13e. Have you experienced a lack of essential equipment needed to provide [METHOD] in the last ONE YEAR? | 13f. If Yes, how many total days did you lack essential equipment needed to provide [METHOD] in the last ONE YEAR? |
| (04) Male condom                                                                                                                                                                                                                                                               | PROVIDE & COUNSEL.....1<br>COUNSEL, NOT PROVIDE.....2<br>KNOW LITTLE ABOUT.....3 } (05)<br>DO NOT KNOW.....8                                                                                                                                                                                                                                                                                              | YES.....1<br>NO.....2→ (05)                                                  | YES.....1<br>NO.....2→ (05)<br>PRESCRIPTION ONLY.....3→ (05)                                                              | DAYS...<br><input type="text"/> <input type="text"/> <input type="text"/><br>CONSTANT PROBLEM...995<br>DON'T KNOW..998          |                                                                                                          |                                                                                                                    |
| (05) Female condom                                                                                                                                                                                                                                                             | PROVIDE & COUNSEL.....1<br>COUNSEL, NOT PROVIDE.....2<br>KNOW LITTLE ABOUT.....3 } (06)<br>DO NOT KNOW.....8                                                                                                                                                                                                                                                                                              | YES.....1<br>NO.....2→ (06)                                                  | YES.....1<br>NO.....2→ (06)<br>PRESCRIPTION ONLY.....3→ (06)                                                              | DAYS...<br><input type="text"/> <input type="text"/> <input type="text"/><br>CONSTANT PROBLEM...995<br>DON'T KNOW..998          |                                                                                                          |                                                                                                                    |
| (06) Emergency contraception                                                                                                                                                                                                                                                   | PROVIDE & COUNSEL.....1<br>COUNSEL, NOT PROVIDE.....2<br>KNOW LITTLE ABOUT.....3 } (07)<br>DO NOT KNOW.....8                                                                                                                                                                                                                                                                                              | YES.....1<br>NO.....2→ (07)                                                  | YES.....1<br>NO.....2→ (07)<br>PRESCRIPTION ONLY.....3→ (07)                                                              | DAYS...<br><input type="text"/> <input type="text"/> <input type="text"/><br>CONSTANT PROBLEM...995<br>DON'T KNOW..998          |                                                                                                          |                                                                                                                    |

| <b>Now I would like to ask you some questions about your knowledge and provision of various methods of family planning. If you have provided a particular method before, we are also interested in the availability and quality of the materials required to provide that method.</b> |                                                                                                                                                                                                                                                                                                                                                                                                           |                                                                              |                                                                                                                           |                                                                                                                                 |                                                                                                          |                                                                                                                           |
|---------------------------------------------------------------------------------------------------------------------------------------------------------------------------------------------------------------------------------------------------------------------------------------|-----------------------------------------------------------------------------------------------------------------------------------------------------------------------------------------------------------------------------------------------------------------------------------------------------------------------------------------------------------------------------------------------------------|------------------------------------------------------------------------------|---------------------------------------------------------------------------------------------------------------------------|---------------------------------------------------------------------------------------------------------------------------------|----------------------------------------------------------------------------------------------------------|---------------------------------------------------------------------------------------------------------------------------|
| METHOD                                                                                                                                                                                                                                                                                | 13a. Can you please tell me which of the following best describes your knowledge of [METHOD]:<br>1. You know METHOD sufficiently well to counsel and provide/assist in provision to a client;<br>2. You know METHOD sufficiently well to counsel, but not to provide;<br>3. You know little about METHOD and would not feel comfortable counseling or providing;<br>8. You know do not know METHOD at all | 13b. Have you provided (assisted with) [METHOD] to clients at this facility? | 13c. Have you experienced any stockouts in this facility that lasted more than 24 hours of [METHOD] in the last one year? | 13d. If yes, how many total days of stockouts did this facility have in the last ONE YEAR of [METHOD] (all stockouts combined)? | 13e. Have you experienced a lack of essential equipment needed to provide [METHOD] in the last ONE YEAR? | 13f. If Yes, how many total days did you lack essential equipment needed to provide [METHOD] in the last ONE YEAR?        |
| (07)<br>Spermicide                                                                                                                                                                                                                                                                    | PROVIDE & COUNSEL.....1<br>COUNSEL, NOT PROVIDE.....2<br>KNOW LITTLE ABOUT.....3 } (08)<br>DO NOT KNOW.....8                                                                                                                                                                                                                                                                                              | YES.....1<br>NO.....2 → (08)                                                 | YES.....1<br>NO.....2 → (08)<br>PRESCRIPTION ONLY.....3 → (08)                                                            | DAYS...<br><input type="text"/> <input type="text"/> <input type="text"/><br><br>CONSTANT PROBLEM...995<br><br>DON'T KNOW..998  |                                                                                                          |                                                                                                                           |
| (08)<br>Diaphragm                                                                                                                                                                                                                                                                     | PROVIDE & COUNSEL.....1<br>COUNSEL, NOT PROVIDE.....2<br>KNOW LITTLE ABOUT.....3 } (09)<br>DO NOT KNOW.....8                                                                                                                                                                                                                                                                                              | YES.....1<br>NO.....2 → (09)                                                 | YES.....1<br>NO.....2 → (09)<br>PRESCRIPTION ONLY.....3 → (09)                                                            | DAYS...<br><input type="text"/> <input type="text"/> <input type="text"/><br><br>CONSTANT PROBLEM...995<br><br>DON'T KNOW..998  |                                                                                                          |                                                                                                                           |
| (09) IUD                                                                                                                                                                                                                                                                              | PROVIDE & COUNSEL.....1<br>COUNSEL, NOT PROVIDE.....2<br>KNOW LITTLE ABOUT.....3 } (10)<br>DO NOT KNOW.....8                                                                                                                                                                                                                                                                                              | YES.....1<br>NO.....2 → (10)                                                 | YES.....1<br>NO.....2 → (10)<br>PRESCRIPTION ONLY.....3 → (10)                                                            | DAYS...<br><input type="text"/> <input type="text"/> <input type="text"/><br><br>CONSTANT PROBLEM...995<br><br>DON'T KNOW..998  | YES.....1<br>NO.....2 → (10)                                                                             | DAYS...<br><input type="text"/> <input type="text"/> <input type="text"/><br><br>CONSTANT PROBLEM...995<br><br>DK.....998 |

| <b>Now I would like to ask you some questions about your knowledge and provision of various methods of family planning. If you have provided a particular method before, we are also interested in the availability and quality of the materials required to provide that method.</b> |                                                                                                                                                                                                                                                                                                                                                                                                           |                                                                              |                                                                                                                           |                                                                                                                                 |                                                                                                          |                                                                                                                    |
|---------------------------------------------------------------------------------------------------------------------------------------------------------------------------------------------------------------------------------------------------------------------------------------|-----------------------------------------------------------------------------------------------------------------------------------------------------------------------------------------------------------------------------------------------------------------------------------------------------------------------------------------------------------------------------------------------------------|------------------------------------------------------------------------------|---------------------------------------------------------------------------------------------------------------------------|---------------------------------------------------------------------------------------------------------------------------------|----------------------------------------------------------------------------------------------------------|--------------------------------------------------------------------------------------------------------------------|
| METHOD                                                                                                                                                                                                                                                                                | 13a. Can you please tell me which of the following best describes your knowledge of [METHOD]:<br>1. You know METHOD sufficiently well to counsel and provide/assist in provision to a client;<br>2. You know METHOD sufficiently well to counsel, but not to provide;<br>3. You know little about METHOD and would not feel comfortable counseling or providing;<br>8. You know do not know METHOD at all | 13b. Have you provided (assisted with) [METHOD] to clients at this facility? | 13c. Have you experienced any stockouts in this facility that lasted more than 24 hours of [METHOD] in the last one year? | 13d. If yes, how many total days of stockouts did this facility have in the last ONE YEAR of [METHOD] (all stockouts combined)? | 13e. Have you experienced a lack of essential equipment needed to provide [METHOD] in the last ONE YEAR? | 13f. If Yes, how many total days did you lack essential equipment needed to provide [METHOD] in the last ONE YEAR? |
| (10) Implants                                                                                                                                                                                                                                                                         | PROVIDE & COUNSEL.....1<br>COUNSEL, NOT PROVIDE.....2<br>KNOW LITTLE ABOUT.....3 } (11)<br>DO NOT KNOW.....8                                                                                                                                                                                                                                                                                              | YES.....1<br>NO.....2 → (11)                                                 | YES.....1<br>NO.....2 → (11)<br>PRESCRIPTION ONLY.....3 → (11)                                                            | DAYS...<br><input type="text"/> <input type="text"/> <input type="text"/><br>CONSTANT PROBLEM...995<br>DON'T KNOW..998          | YES.....1<br>NO.....2 → (11)                                                                             | DAYS...<br><input type="text"/> <input type="text"/> <input type="text"/><br>CONSTANT PROBLEM...995<br>DK.....998  |
| (11) Female sterilization                                                                                                                                                                                                                                                             | PROVIDE & COUNSEL.....1<br>COUNSEL, NOT PROVIDE.....2<br>KNOW LITTLE ABOUT.....3 } (12)<br>DO NOT KNOW.....8                                                                                                                                                                                                                                                                                              | YES.....1<br>NO.....2 → (12)                                                 |                                                                                                                           |                                                                                                                                 | YES.....1<br>NO.....2 → (12)                                                                             | DAYS...<br><input type="text"/> <input type="text"/> <input type="text"/><br>CONSTANT PROBLEM...995<br>DK.....998  |
| (12) Male sterilization                                                                                                                                                                                                                                                               | PROVIDE & COUNSEL.....1<br>COUNSEL, NOT PROVIDE.....2<br>KNOW LITTLE ABOUT.....3 } (13)<br>DO NOT KNOW.....8                                                                                                                                                                                                                                                                                              | YES.....1<br>NO.....2 → (13)                                                 |                                                                                                                           |                                                                                                                                 | YES.....1<br>NO.....2 → (13)                                                                             | DAYS...<br><input type="text"/> <input type="text"/> <input type="text"/><br>CONSTANT PROBLEM...995<br>DK.....998  |



|                                                                             |                                                                                                                                                                                                                                                                                                |                                                                      |
|-----------------------------------------------------------------------------|------------------------------------------------------------------------------------------------------------------------------------------------------------------------------------------------------------------------------------------------------------------------------------------------|----------------------------------------------------------------------|
|                                                                             | 13a. Can you please tell me which of the following best describes your knowledge of [METHOD]:<br>1. Know the method sufficiently well to counsel and recommend to client<br>2. Know little about the method and would not feel comfortable counseling or recommending<br>8. Do not know method | 13b. Have you ever recommended [METHOD] to clients at this facility? |
| (13) Natural methods (Rhythm, periodic abstinence, withdrawal, cycle beads) | COUNSEL & RECOMMEND.....1<br>KNOW LITTLE ABOUT.....2 } → (14)<br>DO NOT KNOW.....8 }                                                                                                                                                                                                           | Yes.....1<br>No.....2                                                |
| (14) Exclusive breastfeeding method (LAM)                                   | COUNSEL & RECOMMEND.....1<br>KNOW LITTLE ABOUT.....2 } → Q14<br>DO NOT KNOW.....8 }                                                                                                                                                                                                            | Yes.....1<br>No.....2                                                |

**Q14. CHECK Q13A:**

PROVIDES AND/OR COUNSELS ANY FP METHOD (ANY Q13A = 1 OR 2)

DOES NOT PROVIDE AND DOES NOT COUNSEL ANY FP METHOD (ALL Q13A = 3 OR 4)  → Q20

| <b>Now I would like to ask you specifically about the contraceptive methods that you provide.<br/>(ASK ONLY ABOUT THE FAMILY PLANNING METHODS THE RESPONDENT IS PROVIDING – Q13b)</b> |                                                                         |                                                                         |                                                                                                |                                                |                                                                            |                                                      |
|---------------------------------------------------------------------------------------------------------------------------------------------------------------------------------------|-------------------------------------------------------------------------|-------------------------------------------------------------------------|------------------------------------------------------------------------------------------------|------------------------------------------------|----------------------------------------------------------------------------|------------------------------------------------------|
| METHOD                                                                                                                                                                                | Q15a. What is the minimum age that you would offer this [METHOD]?       | Q15b. What is the maximum age that you would offer this [METHOD]?       | Q15c. Is there a minimum number of children a person must have before you will offer [METHOD]? | Q15d. What is that minimum number of children? | Q15e. Do you require a partner's consent before you will provide [METHOD]? | Q15f. Would you offer METHOD to an unmarried person? |
| (1) Combined oral pills                                                                                                                                                               | <input type="text"/> <input type="text"/><br>NO MIN.....93<br>DK.....98 | <input type="text"/> <input type="text"/><br>NO MAX.....93<br>DK.....98 | YES ... 1<br>NO .....2 →Q15e<br>DK.....8→Q15e                                                  | <input type="text"/> <input type="text"/>      | YES ... 1<br>NO .....2                                                     | YES ... 1<br>NO .....2                               |
| (2) Progestin-only pill                                                                                                                                                               | <input type="text"/> <input type="text"/><br>NO MIN.....93<br>DK.....98 | <input type="text"/> <input type="text"/><br>NO MAX.....93<br>DK.....98 | YES ... 1<br>NO .....2 →Q15e<br>DK.....8→Q15e                                                  | <input type="text"/> <input type="text"/>      | YES ... 1<br>NO .....2                                                     | YES ... 1<br>NO .....2                               |
| (3) Male condom                                                                                                                                                                       | <input type="text"/> <input type="text"/><br>NO MIN.....93<br>DK.....98 | <input type="text"/> <input type="text"/><br>NO MAX.....93<br>DK.....98 | YES ... 1<br>NO .....2 →Q15e<br>DK.....8→Q15e                                                  | <input type="text"/> <input type="text"/>      | YES ... 1<br>NO .....2                                                     | YES ... 1<br>NO .....2                               |
| (4) Female condom                                                                                                                                                                     | <input type="text"/> <input type="text"/><br>NO MIN.....93<br>DK.....98 | <input type="text"/> <input type="text"/><br>NO MAX.....93<br>DK.....98 | YES ... 1<br>NO .....2 →Q15e<br>DK.....8→Q15e                                                  | <input type="text"/> <input type="text"/>      | YES ... 1<br>NO .....2                                                     | YES ... 1<br>NO .....2                               |
| (5) IUD                                                                                                                                                                               | <input type="text"/> <input type="text"/><br>NO MIN.....93<br>DK.....98 | <input type="text"/> <input type="text"/><br>NO MAX.....93<br>DK.....98 | YES ... 1<br>NO .....2 →Q15e<br>DK.....8→Q15e                                                  | <input type="text"/> <input type="text"/>      | YES ... 1<br>NO .....2                                                     | YES ... 1<br>NO .....2                               |
| (6) Spermicide                                                                                                                                                                        | <input type="text"/> <input type="text"/><br>NO MIN.....93<br>DK.....98 | <input type="text"/> <input type="text"/><br>NO MAX.....93<br>DK.....98 | YES ... 1<br>NO .....2 →Q15e<br>DK.....8→Q15e                                                  | <input type="text"/> <input type="text"/>      | YES ... 1<br>NO .....2                                                     | YES ... 1<br>NO .....2                               |
| (7) Diaphragm                                                                                                                                                                         | <input type="text"/> <input type="text"/><br>NO MIN.....93<br>DK.....98 | <input type="text"/> <input type="text"/><br>NO MAX.....93<br>DK.....98 | YES ... 1<br>NO .....2 →Q15e<br>DK.....8→Q15e                                                  | <input type="text"/> <input type="text"/>      | YES ... 1<br>NO .....2                                                     | YES ... 1<br>NO .....2                               |
| (8) Injectables                                                                                                                                                                       | <input type="text"/> <input type="text"/><br>NO MIN.....93<br>DK.....98 | <input type="text"/> <input type="text"/><br>NO MAX.....93<br>DK.....98 | YES ... 1<br>NO .....2 →Q15e<br>DK.....8→Q15e                                                  | <input type="text"/> <input type="text"/>      | YES ... 1<br>NO .....2                                                     | YES ... 1<br>NO .....2                               |
| (9) Implants                                                                                                                                                                          | <input type="text"/> <input type="text"/><br>NO MIN.....93<br>DK.....98 | <input type="text"/> <input type="text"/><br>NO MAX.....93<br>DK.....98 | YES ... 1<br>NO .....2 →Q15e<br>DK.....8→Q15e                                                  | <input type="text"/> <input type="text"/>      | YES ... 1<br>NO .....2                                                     | YES ... 1<br>NO .....2                               |
| (10) Male sterilization                                                                                                                                                               | <input type="text"/> <input type="text"/><br>NO MIN.....93<br>DK.....98 | <input type="text"/> <input type="text"/><br>NO MAX...93<br>DK.....98   | YES ... 1<br>NO .....2 →Q15e<br>DK.....8→Q15e                                                  | <input type="text"/> <input type="text"/>      | YES ... 1<br>NO .....2                                                     | YES ... 1<br>NO .....2                               |
| (11) Female sterilization                                                                                                                                                             | <input type="text"/> <input type="text"/><br>NO MIN.....93<br>DK.....98 | <input type="text"/> <input type="text"/><br>NO MAX...93<br>DK.....98   | YES ... 1<br>NO .....2 →Q15e<br>DK.....8→Q15e                                                  | <input type="text"/> <input type="text"/>      | YES ... 1<br>NO .....2                                                     | YES ... 1<br>NO .....2                               |
| (12) Emergency contraceptive                                                                                                                                                          | <input type="text"/> <input type="text"/><br>NO MIN...93<br>DK.....98   | <input type="text"/> <input type="text"/><br>NO MAX...93<br>DK.....98   | YES ... 1<br>NO .....2 →Q15e<br>DK.....8→Q15e                                                  | <input type="text"/> <input type="text"/>      | YES ... 1<br>NO .....2                                                     | YES ... 1<br>NO .....2                               |

|      |                                                                                                                                                                                                                                                             |                                                                                                                                                                                                                                                                                                                                                                                                                                                                                                          |  |
|------|-------------------------------------------------------------------------------------------------------------------------------------------------------------------------------------------------------------------------------------------------------------|----------------------------------------------------------------------------------------------------------------------------------------------------------------------------------------------------------------------------------------------------------------------------------------------------------------------------------------------------------------------------------------------------------------------------------------------------------------------------------------------------------|--|
| Q16. | What do you do/tell the client when talking about FP to clients?<br><br>PROBE – Anything else?<br><b>MULTIPLE RESPONSES POSSIBLE.</b><br><b>CIRCLE ALL MENTIONED.</b>                                                                                       | IDENTIFY REPRODUCTIVE GOALS OF CLIENT.....A<br>PROVIDE INFORMATION ABOUT DIFFERENT FP METHODS.....B<br>DISCUSS THE CLIENT'S FP PREFERENCES.....C<br>HELP CLIENT SELECT A SUITABLE METHOD.....D<br>EXPLAIN THE WAY TO USE THE SELECTED METHOD.....E<br>EXPLAIN THE SIDE-EFFECTS.....F<br>EXPLAIN SPECIFIC MEDICAL REASONS TO RETURN.....G<br>REQUEST FOR PARTNER'S CONSENT.....H<br><br>OTHERS _____ X<br>(SPECIFY)                                                                                       |  |
| Q17. | <b>CHECK Q13B:</b><br><br>PROVIDES HORMONAL METHODS (PILL OF ANY TYPE, IUD, INJECTABLE, OR IMPLANTS: Q13B(1)=1 OR Q13B(2)=1 OR Q13B(3)=1 OR Q13B(9)=1 OR Q13B(10)=1) <input type="checkbox"/>                                                               |                                                                                                                                                                                                                                                                                                                                                                                                                                                                                                          |  |
| Q18. | What do you do for a new client who wants the pill or another hormonal method but is not having her menses?<br><br><b>DO NOT READ OPTIONS</b><br><br>PROBE WITH "Anything else?"<br><br><b>MULTIPLE RESPONSES POSSIBLE.</b><br><b>CIRCLE ALL MENTIONED.</b> | QUESTION TO EXCLUDE PREGNANCY.....A<br>EXAMINE TO EXCLUDE PREGNANCY.....B<br>TEST TO EXCLUDE PREGNANCY.....C<br>TELL HER TO COME BACK AT NEXT MENSES...D<br>TRY TO INDUCE MENSES.....E<br>SUPPLY CONDOMS UNTIL NEXT MENSES.....F<br>SUPPLY HORMONAL METHOD IF REASONABLY CERTAIN SHE IS NOT PREGNANT.....G<br>SUPPLY HORMONAL METHOD AND CONDOMS, ASK HER TO USE CONDOMS UNTIL NEXT MENSES.....H<br>JUST GIVE HORMONAL METHOD.....J<br>REQUEST FOR PARTNER'S CONSENT.....K<br>OTHER _____ X<br>(SPECIFY) |  |
| Q19. | Which kind of personal and financial records do you complete each time you provide a client with family planning services?<br><br><b>MULTIPLE RESPONSES POSSIBLE.</b><br><b>CIRCLE ALL MENTIONED.</b>                                                       | NO RECORD KEPT.....Y<br>A CLIENT RECORD CARD/FORM.....A<br>AN ENTRY IN THE FP REGISTER.....B<br>AN ENTRY IN THE FACILITY LOGBOOK/ REGISTER.....C<br>INFORMAL NOTES IN A NOTEBOOK.....D<br>A PAYMENT RECEIPT IF A FEE IS INVOLVED....E<br>OTHER _____ X<br>(SPECIFY)                                                                                                                                                                                                                                      |  |

| INTEGRATION OF FAMILY PLANNING WITH OTHER SERVICES |                                                                                                                                                                                         |                                                                                                                                                                                                                                                                                                                                            |       |
|----------------------------------------------------|-----------------------------------------------------------------------------------------------------------------------------------------------------------------------------------------|--------------------------------------------------------------------------------------------------------------------------------------------------------------------------------------------------------------------------------------------------------------------------------------------------------------------------------------------|-------|
| Q20.                                               | Which are the other services that you yourself provide to clients at this health facility? READ THE OPTIONS.<br><br><b>MULTIPLE RESPONSES POSSIBLE.</b><br><b>CIRCLE ALL MENTIONED.</b> | ANTE-NATAL CARE.....A<br>DELIVERY SERVICES.....B<br>POST-NATAL CARE.....C<br>POST-ABORTION CARE.....D<br>CHILD IMMUNIZATION.....E<br>CHILD GROWTH MONITORING.....F<br>OTHER CURATIVE SERVICES FOR WOMEN.....G<br>OTHER CURATIVE SERVICES FOR CHILDREN....H<br>HIV/AIDS MANAGEMENT.....I<br>PMTCT.....J<br>VCT.....K<br>NONE OF THESE.....Y | → Q62 |
| Q21.                                               | <b>CHECK Q20:</b><br><br>IF OPTION A (ANTENATAL CARE) IS CIRCLED <input type="checkbox"/>                                                                                               |                                                                                                                                                                                                                                                                                                                                            |       |
| Q22.                                               | During <u>Antenatal care</u> , do you provide information about FP routinely?                                                                                                           | YES.....1<br>NO.....2                                                                                                                                                                                                                                                                                                                      | → Q25 |

|                                                                                                                                                                                                                                                                                                                                                               |                                                                                                                                                                                   |                                                                                                                                                                                                                                                                                                                                                                                                                                                                                                                                                                                                          |                 |
|---------------------------------------------------------------------------------------------------------------------------------------------------------------------------------------------------------------------------------------------------------------------------------------------------------------------------------------------------------------|-----------------------------------------------------------------------------------------------------------------------------------------------------------------------------------|----------------------------------------------------------------------------------------------------------------------------------------------------------------------------------------------------------------------------------------------------------------------------------------------------------------------------------------------------------------------------------------------------------------------------------------------------------------------------------------------------------------------------------------------------------------------------------------------------------|-----------------|
| Q23.                                                                                                                                                                                                                                                                                                                                                          | What do you do/tell the client when talking about FP during antenatal care?<br><br>PROBE: "ANYTHING ELSE?"<br><b>MULTIPLE RESPONSES POSSIBLE.</b><br><b>CIRCLE ALL MENTIONED.</b> | HELP THE WOMAN SELECT A SUITABLE METHOD FOR POST-DELIVERY.....A<br>INFORM ABOUT THE IMPORTANCE OF USING FP BY 40 DAYS POSTPARTUM.....B<br>PROVIDE INFORMATION ON LAM.....C<br>EXPLAIN SIDE-EFFECTS.....D<br>ENCOURAGE WOMEN TO WAIT FOR SOME TIME BEFORE THE NEXT PREGNANCY.....E<br>REQUEST FOR PARTNER'S CONSENT.....F<br>OTHERS: _____X<br>(SPECIFY)                                                                                                                                                                                                                                                  |                 |
| Q24.                                                                                                                                                                                                                                                                                                                                                          | Do you tell women where they can obtain an FP method after delivery?                                                                                                              | YES.....1<br>NO.....2                                                                                                                                                                                                                                                                                                                                                                                                                                                                                                                                                                                    | All skip to Q27 |
| Q25.                                                                                                                                                                                                                                                                                                                                                          | Why are you not able to provide FP information routinely during antenatal care visits?<br><br><b>MULTIPLE RESPONSES POSSIBLE.</b><br><b>CIRCLE ALL MENTIONED.</b>                 | ADEQUATE CONTRACEPTIVE METHODS FREQUENTLY UNAVAILABLE.....A<br>AVAILABLE CONTRACEPTIVES OFTEN PAST EXPIRATION DATE.....B<br>LACK OF STERILE EQUIPMENT SO NO POINT DISCUSSING.....C<br>LACK OF FUNCTIONAL EQUIPMENT SO NO POINT DISCUSSING.....D<br>NO INTEREST IN PROVIDING FP INFORMATION.....E<br>LACK KNOWLEDGE ABOUT FP.....F<br>DO NOT FEEL ADEQUATELY TRAINED TO PROVIDE FP INFORMATION.....G<br>NO INTEREST IN FP ON THE PART OF THE PATIENTS...H<br>OVERLOAD OF WORK/NO TIME TO DISCUSS.....I<br>NO NEED TO.....K<br>NOT A PROFITABLE SERVICE TO PROVIDE.....L<br><br>OTHERS _____X<br>(SPECIFY) |                 |
| Q26.                                                                                                                                                                                                                                                                                                                                                          | Would you be willing to include family planning information routinely in your antenatal care services/visits?                                                                     | YES.....1<br>NO.....2                                                                                                                                                                                                                                                                                                                                                                                                                                                                                                                                                                                    |                 |
| <b>Q27. CHECK Q20:</b><br><br>IF OPTION B (DELIVERY CARE) IS CIRCLED <input type="checkbox"/>  IF OPTION B (DELIVERY CARE) IS <b>NOT</b> CIRCLED <input type="checkbox"/>  <b>Q33</b> |                                                                                                                                                                                   |                                                                                                                                                                                                                                                                                                                                                                                                                                                                                                                                                                                                          |                 |
| Q28.                                                                                                                                                                                                                                                                                                                                                          | During <u>delivery care</u> (anytime before they are discharged from your facility), do you provide information about FP routinely?                                               | YES.....1<br>NO.....2                                                                                                                                                                                                                                                                                                                                                                                                                                                                                                                                                                                    | Q31             |
| Q29.                                                                                                                                                                                                                                                                                                                                                          | What do you do/tell the client when talking about FP during delivery care?<br><br>PROBE: "ANYTHING ELSE?"<br><b>MULTIPLE RESPONSES POSSIBLE.</b><br><b>CIRCLE ALL MENTIONED.</b>  | HELP SELECT SUITABLE FP METHOD BY 40 DAYS POSTPARTUM.....A<br>PROVIDE INFORMATION ON LAM.....B<br>EXPLAIN SIDE-EFFECTS.....C<br>EXPLAIN SPECIFIC MEDICAL REASONS TO RETURN.....D<br>ENCOURAGE WOMEN TO WAIT SOME TIME BEFORE THE NEXT PREGNANCY.....E<br>REQUEST FOR PARTNER'S CONSENT.....F<br>OTHER _____X<br>(SPECIFY)                                                                                                                                                                                                                                                                                |                 |
| Q30.                                                                                                                                                                                                                                                                                                                                                          | Do you tell women where they can obtain an FP method during delivery care?                                                                                                        | YES.....1<br>NO.....2                                                                                                                                                                                                                                                                                                                                                                                                                                                                                                                                                                                    | All skip to Q33 |

|                                                                                                                                                                                                    |                                                                                                                                                                                               |                                                                                                                                                                                                                                                                                                                                                                                                                                                                                                                                                                                                           |  |
|----------------------------------------------------------------------------------------------------------------------------------------------------------------------------------------------------|-----------------------------------------------------------------------------------------------------------------------------------------------------------------------------------------------|-----------------------------------------------------------------------------------------------------------------------------------------------------------------------------------------------------------------------------------------------------------------------------------------------------------------------------------------------------------------------------------------------------------------------------------------------------------------------------------------------------------------------------------------------------------------------------------------------------------|--|
| Q31.                                                                                                                                                                                               | Why are you not able to provide FP information routinely during delivery care?<br><br>PROBE: "ANYTHING ELSE?"<br><b>MULTIPLE RESPONSES POSSIBLE.</b><br><b>CIRCLE ALL MENTIONED.</b>          | ADEQUATE CONTRACEPTIVE METHODS FREQUENTLY UNAVAILABLE.....A<br>AVAILABLE CONTRACEPTIVES OFTEN PAST EXPIRATION DATE.....B<br>LACK OF STERILE EQUIPMENT SO NO POINT DISCUSSING.....C<br>LACK OF FUNCTIONAL EQUIPMENT SO NO POINT DISCUSSING.....D<br>NO INTEREST IN PROVIDING FP INFORMATION.....E<br>LACK KNOWLEDGE ABOUT FP.....F<br>DO NOT FEEL ADEQUATELY TRAINED TO PROVIDE FP INFORMATION.....G<br>NO INTEREST IN FP ON THE PART OF THE PATIENTS...H<br>OVERLOAD OF WORK/NO TIME TO DISCUSS.....I<br>NO NEED TO.....K<br>NOT A PROFITABLE SERVICE TO PROVIDE.....L<br><br>OTHERS _____ X<br>(SPECIFY) |  |
| Q32.                                                                                                                                                                                               | Would you be willing to include family planning information routinely in your delivery care services?                                                                                         | YES.....1<br>NO.....2                                                                                                                                                                                                                                                                                                                                                                                                                                                                                                                                                                                     |  |
| <b>Q33. CHECK Q20:</b><br><br>IF OPTION C (POST-NATAL CARE) IS CIRCLED <input type="checkbox"/><br>IF OPTION C (POST-NATAL CARE) IS <b>NOT</b> CIRCLED <input type="checkbox"/> → <b>Q38</b>       |                                                                                                                                                                                               |                                                                                                                                                                                                                                                                                                                                                                                                                                                                                                                                                                                                           |  |
| Q34.                                                                                                                                                                                               | During <u>post-natal care</u> visits, do you provide information about FP routinely?                                                                                                          | YES.....1<br>NO.....2 → <b>Q36</b>                                                                                                                                                                                                                                                                                                                                                                                                                                                                                                                                                                        |  |
| Q35.                                                                                                                                                                                               | What do you do/tell the client when talking about FP during post-natal care visits?<br><br>PROBE: "ANYTHING ELSE?"<br><b>MULTIPLE RESPONSES POSSIBLE.</b><br><b>CIRCLE ALL MENTIONED.</b>     | HELP SELECT SUITABLE FP METHOD BY<br>40 DAYS POSTPARTUM.....A<br>PROVIDE INFORMATION ON LAM.....B<br>EXPLAIN SIDE-EFFECTS.....C<br>EXPLAIN SPECIFIC MEDICAL REASONS TO RETURN.....D<br>ENCOURAGE WOMEN TO WAIT SOME TIME BEFORE THE NEXT PREGNANCY.....E<br>REQUEST FOR PARTNER'S CONSENT.....F<br>OTHER _____ X<br>(SPECIFY)                                                                                                                                                                                                                                                                             |  |
| Q36.                                                                                                                                                                                               | Do you tell women where they can obtain an FP method during post-natal care visits?                                                                                                           | YES.....1 } → <b>All skip to Q38</b><br>NO.....2 }                                                                                                                                                                                                                                                                                                                                                                                                                                                                                                                                                        |  |
| Q37.                                                                                                                                                                                               | Why are you not able to provide FP information routinely during post-natal care visits?<br><br>PROBE: "ANYTHING ELSE?"<br><b>MULTIPLE RESPONSES POSSIBLE.</b><br><b>CIRCLE ALL MENTIONED.</b> | ADEQUATE CONTRACEPTIVE METHODS FREQUENTLY UNAVAILABLE.....A<br>AVAILABLE CONTRACEPTIVES OFTEN PAST EXPIRATION DATE.....B<br>LACK OF STERILE EQUIPMENT SO NO POINT DISCUSSING.....C<br>LACK OF FUNCTIONAL EQUIPMENT SO NO POINT DISCUSSING.....D<br>NO INTEREST IN PROVIDING FP INFORMATION.....E<br>LACK KNOWLEDGE ABOUT FP.....F<br>DO NOT FEEL ADEQUATELY TRAINED TO PROVIDE FP INFORMATION.....G<br>NO INTEREST IN FP ON THE PART OF THE PATIENTS...H<br>OVERLOAD OF WORK/NO TIME TO DISCUSS.....I<br>NO NEED TO.....K<br>NOT A PROFITABLE SERVICE TO PROVIDE.....L<br><br>OTHERS _____ X<br>(SPECIFY) |  |
| <b>Q38. CHECK Q20:</b><br><br>IF OPTION D (POST-ABORTION CARE) IS CIRCLED <input type="checkbox"/><br>IF OPTION D (POST-ABORTION CARE) IS <b>NOT</b> CIRCLED <input type="checkbox"/> → <b>Q44</b> |                                                                                                                                                                                               |                                                                                                                                                                                                                                                                                                                                                                                                                                                                                                                                                                                                           |  |

|                                                                                                                                                                                                                                                                                                                                  |                                                                                                                                                                                                                      |                                                                                                                                                                                                                                                                                                                                                                                                                                                                                                                                                                                                       |                        |
|----------------------------------------------------------------------------------------------------------------------------------------------------------------------------------------------------------------------------------------------------------------------------------------------------------------------------------|----------------------------------------------------------------------------------------------------------------------------------------------------------------------------------------------------------------------|-------------------------------------------------------------------------------------------------------------------------------------------------------------------------------------------------------------------------------------------------------------------------------------------------------------------------------------------------------------------------------------------------------------------------------------------------------------------------------------------------------------------------------------------------------------------------------------------------------|------------------------|
| Q39.                                                                                                                                                                                                                                                                                                                             | During a <u>post abortion care</u> , do you provide information about FP routinely?                                                                                                                                  | YES.....1<br>NO.....2 →                                                                                                                                                                                                                                                                                                                                                                                                                                                                                                                                                                               | <b>Q42</b>             |
| Q40.                                                                                                                                                                                                                                                                                                                             | What do/tell the client when talking about FP during post abortion care visits?<br><br>PROBE: "ANYTHING ELSE?"<br><b>MULTIPLE RESPONSES POSSIBLE.</b><br><b>CIRCLE ALL MENTIONED.</b>                                | IDENTIFY REPRODUCTIVE GOALS OF WOMAN.....A<br>PROVIDE INFORMATION ABOUT DIFFERENT FP METHODS.....B<br>DISCUSS THE CLIENT'S FP PREFERENCES.....C<br>HELP WOMEN SELECT A SUITABLE METHOD.....D<br>EDUCATE WOMEN TO USE THE SELECTED METHOD.....E<br>INFORM ABOUT HOW SOON AFTER ABORTION SHE MAY BECOME PREGNANT IF NOT USING CONTRACEPTION.....F<br>EXPLAIN SIDE-EFFECTS.....G<br>EXPLAIN SPECIFIC MEDICAL REASONS TO RETURN.....H<br>REQUEST FOR PARTNER'S CONSENT.....I<br>OTHERS:.....X<br>(SPECIFY)                                                                                                |                        |
| Q41.                                                                                                                                                                                                                                                                                                                             | Do you tell women where they can obtain an FP method during post abortion care visits?                                                                                                                               | YES.....1<br>NO.....2 →                                                                                                                                                                                                                                                                                                                                                                                                                                                                                                                                                                               | <b>All skip to Q44</b> |
| Q42.                                                                                                                                                                                                                                                                                                                             | Why are you not able to provide FP information routinely during post abortion care visits?<br><br>PROBE: "ANYTHING ELSE?"<br><b>MULTIPLE RESPONSES POSSIBLE.</b><br><b>CIRCLE ALL MENTIONED.</b>                     | ADEQUATE CONTRACEPTIVE METHODS FREQUENTLY UNAVAILABLE.....A<br>AVAILABLE CONTRACEPTIVES OFTEN PAST EXPIRATION DATE.....B<br>LACK OF STERILE EQUIPMENT SO NO POINT DISCUSSING.....C<br>LACK OF FUNCTIONAL EQUIPMENT SO NO POINT DISCUSSING.....D<br>NO INTEREST IN PROVIDING FP INFORMATION.....E<br>LACK KNOWLEDGE ABOUT FP.....F<br>DO NOT FEEL ADEQUATELY TRAINED TO PROVIDE FP INFORMATION.....G<br>NO INTEREST IN FP ON THE PART OF THE PATIENTS.....H<br>OVERLOAD OF WORK/NO TIME TO DISCUSS.....I<br>NO NEED TO.....K<br>NOT A PROFITABLE SERVICE TO PROVIDE.....L<br>OTHERS.....X<br>(SPECIFY) |                        |
| Q43.                                                                                                                                                                                                                                                                                                                             | Would you be willing to include family planning information routinely in your post abortion care services/visits?                                                                                                    | YES.....1<br>NO.....2                                                                                                                                                                                                                                                                                                                                                                                                                                                                                                                                                                                 |                        |
| <p><b>Q44. CHECK Q20:</b></p> <p>IF <b>EITHER</b> OPTION E (CHILD IMMUNIZATION) OR OPTION F (CHILD GROWTH MONITORING) IS CIRCLED <input type="checkbox"/> → <b>Q50</b></p> <p>IF <b>NEITHER</b> OPTION E (CHILD IMMUNIZATION) <b>NOR</b> OPTION F (CHILD GROWTH MONITORING) IS CIRCLED <input type="checkbox"/> → <b>Q50</b></p> |                                                                                                                                                                                                                      |                                                                                                                                                                                                                                                                                                                                                                                                                                                                                                                                                                                                       |                        |
| Q45.                                                                                                                                                                                                                                                                                                                             | During <u>child immunization/child growth monitoring</u> , do you provide information about FP routinely?                                                                                                            | YES.....1<br>NO.....2 →                                                                                                                                                                                                                                                                                                                                                                                                                                                                                                                                                                               | <b>Q48</b>             |
| Q46.                                                                                                                                                                                                                                                                                                                             | What do you do/tell clients when talking about FP during child immunization or child growth monitoring visits?<br><br>PROBE: "ANYTHING ELSE?"<br><b>MULTIPLE RESPONSES POSSIBLE.</b><br><b>CIRCLE ALL MENTIONED.</b> | IDENTIFY REPRODUCTIVE GOALS OF WOMAN.....A<br>PROVIDE INFORMATION ABOUT DIFFERENT FP METHODS.....B<br>DISCUSS THE CLIENT'S FP PREFERENCES.....C<br>HELP WOMEN SELECT A SUITABLE METHOD.....D<br>EDUCATE WOMEN TO USE THE SELECTED METHOD.....E<br>EXPLAIN SIDE-EFFECTS.....F<br>EXPLAIN SPECIFIC MEDICAL REASONS TO RETURN.....G<br>REQUEST FOR PARTNER'S CONSENT.....H<br>OTHERS:.....X<br>(SPECIFY)                                                                                                                                                                                                 |                        |
| Q47.                                                                                                                                                                                                                                                                                                                             | Do you tell women where they can obtain an FP method?                                                                                                                                                                | Yes.....1<br>No.....2 →                                                                                                                                                                                                                                                                                                                                                                                                                                                                                                                                                                               | <b>All skip to Q50</b> |

|                                                                                                                                                                                                                                                                                                                                                                                                                                                                                             |                                                                                                                                                                                 |                                                                                                                                                                                                                                                                                                                                                                                                                                                                                                                                                                                                  |  |
|---------------------------------------------------------------------------------------------------------------------------------------------------------------------------------------------------------------------------------------------------------------------------------------------------------------------------------------------------------------------------------------------------------------------------------------------------------------------------------------------|---------------------------------------------------------------------------------------------------------------------------------------------------------------------------------|--------------------------------------------------------------------------------------------------------------------------------------------------------------------------------------------------------------------------------------------------------------------------------------------------------------------------------------------------------------------------------------------------------------------------------------------------------------------------------------------------------------------------------------------------------------------------------------------------|--|
| Q48.                                                                                                                                                                                                                                                                                                                                                                                                                                                                                        | Why are you not able to provide FP information routinely?<br><br>PROBE: "ANYTHING ELSE?"<br><b>MULTIPLE RESPONSES POSSIBLE.</b><br><b>CIRCLE ALL MENTIONED.</b>                 | ADEQUATE CONTRACEPTIVE METHODS FREQUENTLY UNAVAILABLE.....A<br>AVAILABLE CONTRACEPTIVES OFTEN PAST EXPIRATION DATE.....B<br>LACK OF STERILE EQUIPMENT SO NO POINT DISCUSSING.....C<br>LACK OF FUNCTIONAL EQUIPMENT SO NO POINT DISCUSSING.....D<br>NO INTEREST IN PROVIDING FP INFORMATION.....E<br>LACK KNOWLEDGE ABOUT FP.....F<br>DO NOT FEEL ADEQUATELY TRAINED TO PROVIDE FP INFORMATION.....G<br>NO INTEREST IN FP ON THE PART OF THE PATIENTS.....H<br>OVERLOAD OF WORK/NO TIME.....I<br>NO NEED TO.....K<br>NOT A PROFITABLE SERVICE TO PROVIDE.....L<br><br>OTHERS _____ X<br>(SPECIFY) |  |
| Q49.                                                                                                                                                                                                                                                                                                                                                                                                                                                                                        | Would you be willing to include family planning information routinely in your child immunization or child growth monitoring visits?                                             | YES.....1<br>NO.....2                                                                                                                                                                                                                                                                                                                                                                                                                                                                                                                                                                            |  |
| <b>Q50. CHECK Q20:</b><br><br>IF <b>EITHER</b> OPTION G (CURATIVE SERVICES FOR WOMEN) OR H (CURATIVE SERVICES FOR CHILDREN) IS CIRCLED <input type="checkbox"/>  IF <b>NEITHER</b> OPTION G (CURATIVE SERVICES FOR WOMEN) <b>NOR</b> H (CURATIVE SERVICES FOR CHILDREN) IS CIRCLED <input type="checkbox"/>  <b>Q56</b> |                                                                                                                                                                                 |                                                                                                                                                                                                                                                                                                                                                                                                                                                                                                                                                                                                  |  |
| Q51.                                                                                                                                                                                                                                                                                                                                                                                                                                                                                        | While providing curative services to women or children, do you provide information on FP routinely?                                                                             | YES.....1<br>NO.....2  <b>Q54</b>                                                                                                                                                                                                                                                                                                                                                                                                                                                                            |  |
| Q52.                                                                                                                                                                                                                                                                                                                                                                                                                                                                                        | What are the main activities you follow when talking about FP to clients?<br><br>PROBE: "ANYTHING ELSE?"<br><b>MULTIPLE RESPONSES POSSIBLE.</b><br><b>CIRCLE ALL MENTIONED.</b> | IDENTIFY REPRODUCTIVE GOALS OF WOMAN.....A<br>PROVIDE INFORMATION ABOUT DIFFERENT FP METHODS.....B<br>DISCUSS THE CLIENT'S FP PREFERENCES...C<br>HELP WOMEN SELECT A SUITABLE METHOD.....D<br>EDUCATE WOMEN TO USE THE SELECTED METHOD.....E<br>EXPLAIN SIDE-EFFECTS.....F<br>EXPLAIN SPECIFIC MEDICAL REASONS TO RETURN.....G<br>OTHERS: _____ X<br>(SPECIFY)                                                                                                                                                                                                                                   |  |
| Q53.                                                                                                                                                                                                                                                                                                                                                                                                                                                                                        | Do you tell women where they can obtain an FP method?                                                                                                                           | YES.....1<br>NO.....2  <b>All skip to Q56</b>                                                                                                                                                                                                                                                                                                                                                                                                                                                               |  |
| Q54.                                                                                                                                                                                                                                                                                                                                                                                                                                                                                        | Why are you not able to provide FP information routinely?<br><br>PROBE: "ANYTHING ELSE?"<br><b>MULTIPLE RESPONSES POSSIBLE.</b><br><b>CIRCLE ALL MENTIONED.</b>                 | ADEQUATE CONTRACEPTIVE METHODS FREQUENTLY UNAVAILABLE.....A<br>AVAILABLE CONTRACEPTIVES OFTEN PAST EXPIRATION DATE.....B<br>LACK OF STERILE EQUIPMENT SO NO POINT DISCUSSING.....C<br>LACK OF FUNCTIONAL EQUIPMENT SO NO POINT DISCUSSING.....D<br>NO INTEREST IN PROVIDING FP INFORMATION.....E<br>LACK KNOWLEDGE ABOUT FP.....F<br>DO NOT FEEL ADEQUATELY TRAINED TO PROVIDE FP INFORMATION.....G<br>NO INTEREST IN FP ON THE PART OF THE PATIENTS.....H<br>OVERLOAD OF WORK/NO TIME.....I<br>NO NEED TO.....K<br>NOT A PROFITABLE SERVICE TO PROVIDE.....L<br><br>OTHERS _____ X<br>(SPECIFY) |  |

|      |                                                                                                                                                                                                                                                                                    |                                                                                                                                                                                                                                                                                                                                                                                                                                                                                                                                                                                                  |                        |
|------|------------------------------------------------------------------------------------------------------------------------------------------------------------------------------------------------------------------------------------------------------------------------------------|--------------------------------------------------------------------------------------------------------------------------------------------------------------------------------------------------------------------------------------------------------------------------------------------------------------------------------------------------------------------------------------------------------------------------------------------------------------------------------------------------------------------------------------------------------------------------------------------------|------------------------|
| Q55. | Would you be willing to include family planning information routinely in your curative care services/visits for women or children?                                                                                                                                                 | YES.....1<br>NO.....2                                                                                                                                                                                                                                                                                                                                                                                                                                                                                                                                                                            |                        |
| Q56. | <b>CHECK Q20:</b><br>IF <b>ANY</b> OF THE OPTIONS I (HIV/AIDS MANAGEMENT), OPTION J (PMTCT), OR K (VCT) ARE CIRCLED <input type="checkbox"/> IF <b>NONE</b> OF THE OPTIONS I (HIV/AIDS MANAGEMENT), OPTION J (PMTCT), OR K (VCT) ARE CIRCLED <input type="checkbox"/> → <b>Q62</b> |                                                                                                                                                                                                                                                                                                                                                                                                                                                                                                                                                                                                  |                        |
| Q57. | While providing HIV-related services (HIV/AIDS management, PMTCT, and/or VCT) to women and men, do you provide information on FP routinely?                                                                                                                                        | YES.....1<br>NO.....2 →                                                                                                                                                                                                                                                                                                                                                                                                                                                                                                                                                                          | <b>Q60</b>             |
| Q58. | What are the main activities you follow when talking about FP to clients?<br><br>PROBE: "ANYTHING ELSE?"<br><b>MULTIPLE RESPONSES POSSIBLE.</b><br><b>CIRCLE ALL MENTIONED.</b>                                                                                                    | IDENTIFY REPRODUCTIVE GOALS OF WOMAN...A<br>PROVIDE INFORMATION ABOUT DIFFERENT FP METHODS.....B<br>DISCUSS THE CLIENT'S FP PREFERENCES.....C<br>HELP WOMEN SELECT A SUITABLE METHOD.....D<br>EDUCATE WOMEN TO USE THE SELECTED METHOD.....E<br>EXPLAIN SIDE-EFFECTS.....F<br>EXPLAIN SPECIFIC MEDICAL REASONS TO RETURN.....G<br>DISCUSS HIV/AIDS PREVENTION METHODS.....H<br>DISCUSS METHODS NOT RECOMMENDED FOR HIV POSITIVE (LAM, IUD).....I<br>RECOMMEND ALWAYS USE CONDOM IN ADDITION TO OTHER FP METHODS.....J<br>REQUEST FOR PARTNER'S CONSENT.....K<br>OTHERS: _____ X<br>(SPECIFY)     |                        |
| Q59. | Do you tell women where they can obtain an FP method?                                                                                                                                                                                                                              | YES.....1<br>NO.....2 } →                                                                                                                                                                                                                                                                                                                                                                                                                                                                                                                                                                        | <b>All skip to Q62</b> |
| Q60. | Why are you not able to provide FP information routinely?<br><br>PROBE: "ANYTHING ELSE?"<br><b>MULTIPLE RESPONSES POSSIBLE.</b><br><b>CIRCLE ALL MENTIONED.</b>                                                                                                                    | ADEQUATE CONTRACEPTIVE METHODS FREQUENTLY UNAVAILABLE.....A<br>AVAILABLE CONTRACEPTIVES OFTEN PAST EXPIRATION DATE.....B<br>LACK OF STERILE EQUIPMENT SO NO POINT DISCUSSING.....C<br>LACK OF FUNCTIONAL EQUIPMENT SO NO POINT DISCUSSING.....D<br>NO INTEREST IN PROVIDING FP INFORMATION.....E<br>LACK KNOWLEDGE ABOUT FP.....F<br>DO NOT FEEL ADEQUATELY TRAINED TO PROVIDE FP INFORMATION.....G<br>NO INTEREST IN FP ON THE PART OF THE PATIENTS.....H<br>OVERLOAD OF WORK/NO TIME.....I<br>NO NEED TO.....K<br>NOT A PROFITABLE SERVICE TO PROVIDE.....L<br><br>OTHERS _____ X<br>(SPECIFY) |                        |
| Q61. | Would you be willing to include family planning information routinely in your HIV-related services/visits for women and men?                                                                                                                                                       | YES.....1<br>NO.....2                                                                                                                                                                                                                                                                                                                                                                                                                                                                                                                                                                            |                        |



|                                                                                                                                                                   |                                                                                                                                                                   |                   |                                                                                    |                          |
|-------------------------------------------------------------------------------------------------------------------------------------------------------------------|-------------------------------------------------------------------------------------------------------------------------------------------------------------------|-------------------|------------------------------------------------------------------------------------|--------------------------|
| Q62.                                                                                                                                                              | Is this facility linked with another organization that provides family planning methods and materials at a discounted rate or for free (for example PPFN or SFH)? |                   | YES.....1<br>NO.....2 →<br>DON'T KNOW.....8 →                                      | <b>Q64</b><br><b>Q64</b> |
| Q63a.                                                                                                                                                             | What is the name of the organization?                                                                                                                             |                   | Q63b. What year did this facility begin to associate with each organization named? |                          |
|                                                                                                                                                                   | 1.                                                                                                                                                                |                   | YEAR ..... [ ][ ][ ][ ][ ]<br>DON'T KNOW ..... 9998                                |                          |
|                                                                                                                                                                   | 2.                                                                                                                                                                |                   | YEAR ..... [ ][ ][ ][ ][ ]<br>DON'T KNOW ..... 9998                                |                          |
|                                                                                                                                                                   | 3.                                                                                                                                                                |                   | YEAR ..... [ ][ ][ ][ ][ ]<br>DON'T KNOW ..... 9998                                |                          |
|                                                                                                                                                                   | 4.                                                                                                                                                                |                   | YEAR ..... [ ][ ][ ][ ][ ]<br>DON'T KNOW ..... 9998                                |                          |
| Q64.                                                                                                                                                              | RECORD THE TIME<br>IN 24 HOUR FORMAT                                                                                                                              | HOUR ..... [ ][ ] | MINUTES ..... [ ][ ]                                                               |                          |
| Thank you very much for taking the time to answer my questions. Once again, any information you have given will be kept completely confidential. Have a good day! |                                                                                                                                                                   |                   |                                                                                    |                          |
| <b>COMMENTS:</b>                                                                                                                                                  |                                                                                                                                                                   |                   |                                                                                    |                          |
