# Supplementary material for: Contraceptive service provider imposed restrictions to contraceptive access in urban Nigeria
Source: PubMed Central journal article supplement (PMC5389090; doi:10.1186/s12913-017-2233-0), 2017-04-12
Supplement: 12913_2017_2233_MOESM2_ESM.pdf [file 12913_2017_2233_MOESM2_ESM.pdf]

## Measurement, Learning & Evaluation (MLE) Project Pharmacy Audit – Nigeria - 2011

| CITY NAME & CODE _____ [ ]<br>(Abuja=1, Benin=2, Ibadan=3, Ilorin=4, Kaduna=5, Zaria=6)                                                                                                                  |                                    |                                     |                                     |                                                              |          |                        |                            |
|----------------------------------------------------------------------------------------------------------------------------------------------------------------------------------------------------------|------------------------------------|-------------------------------------|-------------------------------------|--------------------------------------------------------------|----------|------------------------|----------------------------|
| LGA NAME & CODE _____ [ ] [ ] [ ] [ ]                                                                                                                                                                    |                                    |                                     |                                     |                                                              |          |                        |                            |
| LOCALITY NAME & CODE _____ [ ] [ ] [ ] [ ] [ ]                                                                                                                                                           |                                    |                                     |                                     |                                                              |          |                        |                            |
| PHARMACY NAME AND CODE _____ [ ] [ ] [ ] [ ] [ ] [ ]                                                                                                                                                     |                                    |                                     |                                     |                                                              |          |                        |                            |
| PHYSICAL ADDRESS OF THIS PHARMACY SHOP _____                                                                                                                                                             |                                    |                                     |                                     |                                                              |          |                        |                            |
| <b>LOCATION OF PHARMACY</b><br>GPS Reading<br>Altitude ..... [ ] [ ] [ ] [ ]<br>Latitude ..... [ N ] [ ] [ ] [ ] [ ] [ ] [ ] [ ] [ ] [ ]<br>Longitude ..... [ E ] [ ] [ ] [ ] [ ] [ ] [ ] [ ] [ ] [ ]    |                                    |                                     |                                     |                                                              |          |                        |                            |
| MANAGING AUTHORITY                                                                                                                                                                                       |                                    |                                     |                                     |                                                              |          |                        |                            |
| Government.....1                                                                                                                                                                                         | Private (for-profit).....2         | NGO (not-for-profit).....3          | Mission.....4                       | Other.....6                                                  |          |                        |                            |
|                                                                                                                                                                                                          |                                    | (Specify)                           |                                     |                                                              |          |                        |                            |
| <b>INTERVIEWER VISITS</b>                                                                                                                                                                                |                                    |                                     |                                     |                                                              |          |                        |                            |
| VISIT No.                                                                                                                                                                                                | 1                                  | 2                                   | 3                                   | FINAL VISIT                                                  |          |                        |                            |
| DATE                                                                                                                                                                                                     | DAY/ MONTH/YEAR<br>[ ] / [ ] / 11] | DAY/ MONTH/ YEAR<br>[ ] / [ ] / 11] | DAY/ MONTH/ YEAR<br>[ ] / [ ] / 11] | DAY [ ] [ ]<br>MONTH [ ] [ ]<br>YEAR [ 2 ] [ 0 ] [ 1 ] [ 1 ] |          |                        |                            |
| INTERVIEWER'S NAME                                                                                                                                                                                       | _____                              | _____                               | _____                               | _____                                                        |          |                        |                            |
| INTERVIEWER CODE                                                                                                                                                                                         | [ ] [ ] [ ]                        | [ ] [ ] [ ]                         | [ ] [ ] [ ]                         | [ ] [ ] [ ]                                                  |          |                        |                            |
| RESULT*                                                                                                                                                                                                  | [ ]                                | [ ]                                 | [ ]                                 | [ ]                                                          |          |                        |                            |
| NEXT VISIT:<br>DATE                                                                                                                                                                                      | [ ] / [ ] / 11]                    | [ ] / [ ] / 11]                     | [ ] / [ ] / 11]                     | TOTAL NO. OF VISITS                                          |          |                        |                            |
| TIME                                                                                                                                                                                                     | [ ] [ ] [ ] [ ]<br>H H M M         | [ ] [ ] [ ] [ ]<br>H H M M          | [ ] [ ] [ ] [ ]<br>H H M M          | [ ]                                                          |          |                        |                            |
| <b>*RESULT CODES:</b><br>1. COMPLETED<br>2. PHARMACY MOVED OR IS DESTROYED<br>3. RESPONDENT NOT AVAILABLE<br>4. RESPONDENT REFUSED<br>5. PARTLY COMPLETED<br>6. POSTPONED<br>7. OTHER _____<br>(Specify) |                                    |                                     |                                     |                                                              |          |                        |                            |
| LANGUAGE OF INTERVIEW                                                                                                                                                                                    | ENGLISH 1                          | HAUSA 2                             | YORUBA 3                            | IGBO 4                                                       | PIDGIN 5 | OTHER(SPECIFY) 6 _____ | TRANSLATOR USED?<br>YES NO |
| NATIVE LANGUAGE OF RESPONDENT                                                                                                                                                                            | 1                                  | 2                                   | 3                                   | 4                                                            | 5        | 6 _____                | 1 2                        |

| FIND THE PERSON IN CHARGE OF MEDICINES. IF HE/SHE IS NOT PRESENT, ASK TO SEE THE PROVIDER MOST KNOWLEDGEABLE ABOUT PHARMACEUTICAL PROCEDURES, PURCHASING, AND MANAGEMENT          |                                                                      |                                                                      |
|-----------------------------------------------------------------------------------------------------------------------------------------------------------------------------------|----------------------------------------------------------------------|----------------------------------------------------------------------|
| POSITION OF PERSON INTERVIEWED                                                                                                                                                    |                                                                      | SEX OF PERSON INTERVIEWED                                            |
| NON-PHARMACIST MANAGER/PROPRIETOR.....1<br>PHARMACIST MANAGER/PROPRIETOR.....2<br>PHARMACIST.....3<br>PHARMACY TECHNICIAN.....4<br>ATTENDANTS.....5<br>OTHER _____ 6<br>(SPECIFY) |                                                                      | MALE.....1<br>FEMALE.....2                                           |
| <b>SUPERVISOR</b>                                                                                                                                                                 | <b>OFFICE EDITOR</b>                                                 | <b>KEYED BY</b>                                                      |
| NAME.....                                                                                                                                                                         | NAME.....                                                            | NAME.....                                                            |
| CODE: <input type="text"/> <input type="text"/> <input type="text"/>                                                                                                              | CODE: <input type="text"/> <input type="text"/> <input type="text"/> | CODE: <input type="text"/> <input type="text"/> <input type="text"/> |
| DATE [ ]/[ ]/11<br>DD MM YY                                                                                                                                                       | DATE [ ]/[ ]/11<br>DD MM YY                                          | DATE [ ]/[ ]/11<br>DD MM YY                                          |

|     |                                     |                                                |                                                   |
|-----|-------------------------------------|------------------------------------------------|---------------------------------------------------|
| Q1. | RECORD THE TIME (IN 24 HOUR FORMAT) | Hour <input type="text"/> <input type="text"/> | Minutes <input type="text"/> <input type="text"/> |
|-----|-------------------------------------|------------------------------------------------|---------------------------------------------------|

| GENERAL FACILITY INFORMATION |                                                                                                                                                                                                                                            |                                                                                                                                                                                                       |       |
|------------------------------|--------------------------------------------------------------------------------------------------------------------------------------------------------------------------------------------------------------------------------------------|-------------------------------------------------------------------------------------------------------------------------------------------------------------------------------------------------------|-------|
| Source                       | Questions                                                                                                                                                                                                                                  | Coding                                                                                                                                                                                                | Skip  |
| Q2.                          | In this PHARMACY shop, how many regular, permanent staff (workers) work here?                                                                                                                                                              | <input type="text"/> <input type="text"/>                                                                                                                                                             |       |
| Q3.                          | In what year did this facility open?<br><br>PROBE: This is very important. Can you tell me how old this facility is? For example, would you say it is about 1, 2, 3, 7, 11, etc years old? <b>FILL IN EITHER YEAR OPENED OR YEARS OLD.</b> | YEAR OPENED..... <input type="text"/> <input type="text"/> <input type="text"/> <input type="text"/><br>DON'T KNOW.....9998<br><b>OR</b><br>YEARS OLD ..... <input type="text"/> <input type="text"/> |       |
| Q4.                          | On average, how many hours per day is the pharmacy open?                                                                                                                                                                                   | HOURS PER DAY ..... <input type="text"/> <input type="text"/>                                                                                                                                         |       |
| Q5.                          | On average, how many days per week is the facility open?                                                                                                                                                                                   | DAYS PER WEEK ..... <input type="text"/>                                                                                                                                                              |       |
| Q6.                          | Is there a trained registered pharmacist who works at least part-time here?                                                                                                                                                                | YES..... 1<br>NO ..... 2                                                                                                                                                                              | → Q8  |
| Q7.                          | How many hours per week does the trained registered pharmacist work here?                                                                                                                                                                  | Hours per week . . . . <input type="text"/> <input type="text"/> <input type="text"/>                                                                                                                 |       |
| Q8.                          | Who is the principal person responsible for managing medical supplies at this pharmacy? By this I mean the person responsible for ordering, receiving and controlling medical supplies.                                                    | PHARMACIST ..... 1<br>DISPENSER ..... 2<br>NON-PHARMACIST MANAGER.....3<br>NON-PHARMACIST PROPRIETOR.....4<br>SUPPLIES OFFICER ..... 5<br>STORE ASSISTANT ..... 7<br>OTHER _____ 6<br>(SPECIFY)       |       |
| Q9.                          | Is there a stock register where the amount of each medicine received, the amount disbursed, and the amount present today (stock balance) is recorded?                                                                                      | YES, OBSERVED ..... 1<br>YES, REPORTED, NOT SEEN . . . 2<br>NO ..... 3                                                                                                                                | → Q12 |
| Q10.                         | How often do you update or reconcile your inventory/stock records?                                                                                                                                                                         | EVERY <input type="text"/> <input type="text"/> DAY(S)<br><br>THE DAY ITEMS ARE<br>RECEIVED OR DISBURSED ..... 95<br>NEVER ..... 97<br>OTHER _____ (specify)..96                                      |       |
| Q11.                         | Is the stock maintenance system computerized?                                                                                                                                                                                              | YES ..... 1<br>NO ..... 2                                                                                                                                                                             |       |

|      |                                                                                                                                                            |                                                                                                                                                                                                                                                                                                                                                         |                              |
|------|------------------------------------------------------------------------------------------------------------------------------------------------------------|---------------------------------------------------------------------------------------------------------------------------------------------------------------------------------------------------------------------------------------------------------------------------------------------------------------------------------------------------------|------------------------------|
| Q12. | <b>CIRCLE THE RESPONSE THAT BEST DESCRIBES THE SYSTEM.</b>                                                                                                 | STOCK RECORDS UPDATED ON THE DAY<br>ITEM RECEIVED/DISBURSED.....1<br><br>STOCK RECORDS NOT ALWAYS UPDATED<br>WHEN ITEM DISBURSED, BUT RECORD OF<br>ITEMS RECEIVED /DISTRIBUTED<br>OBSERVED.....2<br><br>NO RECORDS OBSERVED.....3<br><br>RECORDS NOT UP TO DATE.....4<br><br>OTHER _____ 6<br>(SPECIFY)                                                 |                              |
| Q13. | Have you received any training on family planning?                                                                                                         | YES .....1<br>NO .....2<br>DON'T KNOW .....8                                                                                                                                                                                                                                                                                                            | } → <b>Q16</b>               |
| Q14. | When was the last family planning training that you attended?                                                                                              | DAYS AGO.....1<br>WEEKS AGO.....2<br>MONTHS AGO...3<br>YEARS AGO.....4                                                                                                                                                                                                                                                                                  |                              |
| Q15. | What were the issues covered in the last training?<br><br><b>CIRCLE ALL MENTIONED SPONTANEOUSLY.<br/>DO NOT READ OUT OPTIONS</b>                           | CONTRACEPTIVE TECHNOLOGY UPDATE...A<br>EXCLUSIVE BREASTFEEDING<br>COUNSELING/LAM.....B<br>NATURAL FP (STANDARD DAYS, CYCLE<br>BEADS, ETC.).....C<br>FP COUNSELING SKILLS.....D<br>PILLS.....E<br>CONDOMS.....F<br>SPERMICIDE.....G<br>EMERGENCY CONTRACEPTIVE.....H<br>IUD.....I<br>INJECTABLES.....J<br>DIAPHRAGM.....K<br>OTHERS _____ X<br>(SPECIFY) |                              |
| Q16. | Is information and counseling related to family planning ever provided by staff from this facility to clients?                                             | YES.....1<br>NO .....2<br>DON'T KNOW .....8                                                                                                                                                                                                                                                                                                             |                              |
| Q17. | Before buying a method of family planning in this pharmacy, would you say that a woman receives FP information and counseling always, sometimes, or never? | YES, ALWAYS.....1<br>SOMETIMES .....2<br>NEVER.....3<br>DON'T KNOW .....8                                                                                                                                                                                                                                                                               |                              |
| Q18. | OBSERVE WHETHER THERE ARE ANY FAMILY PLANNING PROMOTIONAL MATERIALS ON DISPLAY (EG, POSTERS, BROCHURES, DANGLERS, CALENDARS, ETC.)                         | DISPLAYED.....1<br>NOT DISPLAYED.....2                                                                                                                                                                                                                                                                                                                  |                              |
| Q19. | Does this pharmacy provide family planning methods?                                                                                                        | YES .....1<br>NO .....2<br>DON'T KNOW .....8                                                                                                                                                                                                                                                                                                            | → <b>Q22a</b>                |
| Q20. | Would you be willing to sell family planning methods at this shop?                                                                                         | YES.....1<br>NO .....2<br>DON'T KNOW .....8                                                                                                                                                                                                                                                                                                             | → <b>END</b><br>→ <b>END</b> |
| Q21. | Which methods would you be willing to sell?<br><br><b>MULTIPLE RESPONSES POSSIBLE..<br/>CIRCLE ALL MENTIONED.</b>                                          | COMBINED PILL .....A<br>PROGESTIN-ONLY PILL .....B<br>PILL (TYPE UNSPECIFIED) .....C<br>MALE CONDOM .....D<br>FEMALE CONDOM .....E<br>IUD.....F<br>SPERMICIDE .....G<br>DIAPHRAGM .....H<br>INJECTABLES.....I<br>IMPLANT .....J<br>EMERGENCY CONTRACEPTIVES .....K<br>OTHER (specify) .....X                                                            | } → <b>ALL GO TO END</b>     |

| ASK IF THE FOLLOWING CONTRACEPTIVES ARE AVAILABLE. FOR EACH ITEM, CIRCLE THE APPROPRIATE CODE.<br>FOR ALL ITEMS THAT ARE OBSERVED, ASK IF THERE HAS BEEN ANY STOCK-OUT (BRAND NOT AVAILABLE FOR AT LEAST 24 HOURS) DURING THE LAST 12 MONTHS AND LAST 30 DAYS. |                                                                                   |                                                                                                                                                                                                                                                 |                                                                                                                                        |                                                                                                                                          |                                                                                                                                                              |                                                                                                                                                                                                 |                                                                                                                                                                          |                                                                                                                                                                                                          |                                                                                                                                                           |
|----------------------------------------------------------------------------------------------------------------------------------------------------------------------------------------------------------------------------------------------------------------|-----------------------------------------------------------------------------------|-------------------------------------------------------------------------------------------------------------------------------------------------------------------------------------------------------------------------------------------------|----------------------------------------------------------------------------------------------------------------------------------------|------------------------------------------------------------------------------------------------------------------------------------------|--------------------------------------------------------------------------------------------------------------------------------------------------------------|-------------------------------------------------------------------------------------------------------------------------------------------------------------------------------------------------|--------------------------------------------------------------------------------------------------------------------------------------------------------------------------|----------------------------------------------------------------------------------------------------------------------------------------------------------------------------------------------------------|-----------------------------------------------------------------------------------------------------------------------------------------------------------|
| CONTRA-<br>CEPTIVE<br><br>(ASK FOR<br>MOST<br>POPULAR<br>BRANDS)                                                                                                                                                                                               | Q22a. Does<br>this<br>pharmacy<br>usually sell<br>the following<br>FP<br>methods? | Q22b. What brands do you<br>usually stock?<br><b>LIST ALL BRAND<br/>NAMES USUALLY<br/>STOCKED, EVEN IF<br/>CURRENTLY OUT OF<br/>STOCK. IF MORE THAN<br/>3 BRANDS, LIST THE 3<br/>MOST POPULAR<br/>BRANDS (CODING TO<br/>BE DONE IN OFFICE).</b> | Q22c. What is<br>the retail price<br>(in Naira) for<br><br>[PRODUCT/<br>BRAND]?                                                        | Q22d. What is<br>the average<br>retail sales<br>volume in a<br>month?                                                                    | Q22e. Is<br><br>[PRODUCT/<br>BRAND]<br>currently<br>available?                                                                                               | Q22f. Has _____<br>[PRODUCT/<br>BRAND] been<br>stocked out in this<br>store for at least 24<br>hours in the last<br><b>ONE</b> year?<br><b>IF NO OR DON'T<br/>KNOW, SKIP TO<br/>NEXT BRAND.</b> | Q22g. In the<br>past one year, for<br>how many total<br>days were you<br>stocked out of<br><br>[PRODUCT/<br>BRAND] (all<br>stock-outs<br>combined)?                      | Q22h. Has _____<br>[PRODUCT/<br>BRAND] been<br>stocked out for at<br>least 24 hours in<br>the last <b>ONE</b><br>month (30 days)?<br><b>IF NO OR DON'T<br/>KNOW, SKIP TO<br/>NEXT BRAND/<br/>METHOD.</b> | Q22i. In the last<br>30 days, for how<br>many total days<br>were you stocked<br>out of _____<br>[PRODUCT/<br>BRAND] (all stock-<br>outs combined)?        |
| (1) Combination oral<br>contraceptives<br>(estrogen and pro-<br>gestin)                                                                                                                                                                                        | YES..1<br>NO...2→(2)                                                              | <br>_____[ ] [ ] [ ] [ ]<br>BRAND (1)<br><br>_____[ ] [ ] [ ] [ ]<br>BRAND (2)<br><br>_____[ ] [ ] [ ] [ ]<br>BRAND (3)                                                                                                                         | RETAIL PRICE<br>PER CYCLE:<br><br>[ ] [ ] [ ] [ ]<br>BRAND (1)<br><br>[ ] [ ] [ ] [ ]<br>BRAND (2)<br><br>[ ] [ ] [ ] [ ]<br>BRAND (3) | SALES<br>VOLUME<br>(CYCLES):<br><br>[ ] [ ] [ ] [ ]<br>BRAND (1)<br><br>[ ] [ ] [ ] [ ]<br>BRAND (2)<br><br>[ ] [ ] [ ] [ ]<br>BRAND (3) | YES . .1<br>NO .....2<br><br><input type="checkbox"/><br>BRAND (1)<br><br><input type="checkbox"/><br>BRAND (2)<br><br><input type="checkbox"/><br>BRAND (3) | YES....1<br>NO .....2<br>DK.....8<br><br><input type="checkbox"/><br>BRAND (1)<br><br><input type="checkbox"/><br>BRAND (2)<br><br><input type="checkbox"/><br>BRAND (3)                        | RECORD DAYS:<br><br>[ ] [ ] [ ]<br>BRAND (1)<br>Don't know...998<br><br>[ ] [ ] [ ]<br>BRAND (2)<br>Don't know...998<br><br>[ ] [ ] [ ]<br>BRAND (3)<br>Don't know...998 | YES....1<br>NO .....2<br>DK.....8<br><br><input type="checkbox"/><br>BRAND (1)<br><br><input type="checkbox"/><br>BRAND (2)<br><br><input type="checkbox"/><br>BRAND (3)                                 | RECORD DAYS:<br><br>[ ] [ ]<br>BRAND (1)<br>Don't know...98<br><br>[ ] [ ]<br>BRAND (2)<br>Don't know...98<br><br>[ ] [ ]<br>BRAND (3)<br>Don't know...98 |
| (2) Progestin-<br>only oral<br>contraceptives                                                                                                                                                                                                                  | YES..1<br>NO...2 <input type="checkbox"/> (3)                                     | <br>_____[ ] [ ] [ ] [ ]<br>BRAND (1)<br><br>_____[ ] [ ] [ ] [ ]<br>BRAND (2)<br><br>_____[ ] [ ] [ ] [ ]<br>BRAND (3)                                                                                                                         | RETAIL PRICE<br>PER CYCLE:<br><br>[ ] [ ] [ ] [ ]<br>BRAND (1)<br><br>[ ] [ ] [ ] [ ]<br>BRAND (2)<br><br>[ ] [ ] [ ] [ ]<br>BRAND (3) | SALES<br>VOLUME<br>(CYCLES):<br><br>[ ] [ ] [ ] [ ]<br>BRAND (1)<br><br>[ ] [ ] [ ] [ ]<br>BRAND (2)<br><br>[ ] [ ] [ ] [ ]<br>BRAND (3) | YES . .1<br>NO .....2<br><br><input type="checkbox"/><br>BRAND (1)<br><br><input type="checkbox"/><br>BRAND (2)<br><br><input type="checkbox"/><br>BRAND (3) | YES....1<br>NO .....2<br>DK.....8<br><br><input type="checkbox"/><br>BRAND (1)<br><br><input type="checkbox"/><br>BRAND (2)<br><br><input type="checkbox"/><br>BRAND (3)                        | RECORD DAYS:<br><br>[ ] [ ] [ ]<br>BRAND (1)<br>Don't know...998<br><br>[ ] [ ] [ ]<br>BRAND (2)<br>Don't know...998<br><br>[ ] [ ] [ ]<br>BRAND (3)<br>Don't know...998 | YES....1<br>NO .....2<br>DK.....8<br><br><input type="checkbox"/><br>BRAND (1)<br><br><input type="checkbox"/><br>BRAND (2)<br><br><input type="checkbox"/><br>BRAND (3)                                 | RECORD DAYS:<br><br>[ ] [ ]<br>BRAND (1)<br>Don't know...98<br><br>[ ] [ ]<br>BRAND (2)<br>Don't know...98<br><br>[ ] [ ]<br>BRAND (3)<br>Don't know...98 |

| CONTRA-<br>CEPTIVE<br><br>(ASK FOR<br>MOST<br>POPULAR<br>BRANDS) | Q22a. Does<br>this<br>pharmacy<br>usually sell<br>the following<br>FP<br>methods? | Q22b. What brands do you<br>usually stock?<br><b>LIST ALL BRAND<br/>NAMES USUALLY<br/>STOCKED, EVEN IF<br/>CURRENTLY OUT OF<br/>STOCK. IF THERE ARE<br/>MORE THAN 3 BRANDS,<br/>LIST THE 3 MOST<br/>POPULAR BRANDS</b><br>(CODING WILL BE DONE<br>IN THE OFFICE). | Q22c. What is<br>the retail price<br>(in Naira) for<br><br>[PRODUCT/<br>BRAND]?                                                        | Q22d. What is<br>the average<br>retail sales<br>volume in a<br>month?                                                                    | Q22e. Is<br><br>[PRODUCT/<br>BRAND]<br>currently<br>available?                                                                                               | Q22f. Has _____<br>[PRODUCT/<br>BRAND] been<br>stocked out in this<br>store for at least 24<br>hours in the last<br><b>ONE</b> year?<br><b>IF NO OR DON'T<br/>KNOW, SKIP TO<br/>NEXT BRAND.</b> | Q22g. In the<br>past one year, for<br>how many total<br>days were you<br>stocked out of<br><br>[PRODUCT/<br>BRAND] (all<br>stock-outs<br>combined)?                         | Q22h. Has _____<br>[PRODUCT/<br>BRAND] been<br>stocked out for at<br>least 24 hours in<br>the last <b>ONE</b><br>month (30 days)?<br><b>IF NO OR DON'T<br/>KNOW, SKIP TO<br/>NEXT BRAND/<br/>METHOD.</b> | Q22i. In the last<br>30 days, for how<br>many total days<br>were you stocked<br>out of _____<br>[PRODUCT/<br>BRAND] (all stock-<br>outs combined)?                       |
|------------------------------------------------------------------|-----------------------------------------------------------------------------------|-------------------------------------------------------------------------------------------------------------------------------------------------------------------------------------------------------------------------------------------------------------------|----------------------------------------------------------------------------------------------------------------------------------------|------------------------------------------------------------------------------------------------------------------------------------------|--------------------------------------------------------------------------------------------------------------------------------------------------------------|-------------------------------------------------------------------------------------------------------------------------------------------------------------------------------------------------|-----------------------------------------------------------------------------------------------------------------------------------------------------------------------------|----------------------------------------------------------------------------------------------------------------------------------------------------------------------------------------------------------|--------------------------------------------------------------------------------------------------------------------------------------------------------------------------|
| (3) Emergenc<br>y<br>contracept<br>ives                          | YES..1<br>NO...2→(4)                                                              | _____<br>BRAND (1) [ ][ ][ ][ ]<br><br>_____<br>BRAND (2) [ ][ ][ ][ ]<br><br>_____<br>BRAND (3) [ ][ ][ ][ ]                                                                                                                                                     | RETAIL PRICE<br>PER PACK:<br><br>[ ][ ][ ][ ][ ]<br>BRAND (1)<br><br>[ ][ ][ ][ ][ ]<br>BRAND (2)<br><br>[ ][ ][ ][ ][ ]<br>BRAND (3)  | SALES<br>VOLUME<br>(PACKS):<br><br>[ ][ ][ ][ ][ ]<br>BRAND (1)<br><br>[ ][ ][ ][ ][ ]<br>BRAND (2)<br><br>[ ][ ][ ][ ][ ]<br>BRAND (3)  | YES . .1<br>NO .....2<br><br><input type="checkbox"/><br>BRAND (1)<br><br><input type="checkbox"/><br>BRAND (2)<br><br><input type="checkbox"/><br>BRAND (3) | YES....1<br>NO .....2<br>DK.....8<br><br><input type="checkbox"/><br>BRAND (1)<br><br><input type="checkbox"/><br>BRAND (2)<br><br><input type="checkbox"/><br>BRAND (3)                        | RECORD DAYS:<br><br>[ ][ ][ ][ ]<br>BRAND (1)<br>Don't know...998<br><br>[ ][ ][ ][ ]<br>BRAND (2)<br>Don't know...998<br><br>[ ][ ][ ][ ]<br>BRAND (3)<br>Don't know...998 | YES....1<br>NO .....2<br>DK.....8<br><br><input type="checkbox"/><br>BRAND (1)<br><br><input type="checkbox"/><br>BRAND (2)<br><br><input type="checkbox"/><br>BRAND (3)                                 | RECORD DAYS:<br><br>[ ][ ][ ][ ]<br>BRAND (1)<br>Don't know...98<br><br>[ ][ ][ ][ ]<br>BRAND (2)<br>Don't know...98<br><br>[ ][ ][ ][ ]<br>BRAND (3)<br>Don't know...98 |
| (4) Male<br>condoms                                              | YES..1<br>NO...2→(5)                                                              | _____<br>BRAND (1) [ ][ ][ ][ ]<br><br>_____<br>BRAND (2) [ ][ ][ ][ ]<br><br>_____<br>BRAND (3) [ ][ ][ ][ ]                                                                                                                                                     | RETAIL PRICE<br>PER PIECE:<br><br>[ ][ ][ ][ ][ ]<br>BRAND (1)<br><br>[ ][ ][ ][ ][ ]<br>BRAND (2)<br><br>[ ][ ][ ][ ][ ]<br>BRAND (3) | SALES<br>VOLUME<br>(PIECES):<br><br>[ ][ ][ ][ ][ ]<br>BRAND (1)<br><br>[ ][ ][ ][ ][ ]<br>BRAND (2)<br><br>[ ][ ][ ][ ][ ]<br>BRAND (3) | YES . .1<br>NO .....2<br><br><input type="checkbox"/><br>BRAND (1)<br><br><input type="checkbox"/><br>BRAND (2)<br><br><input type="checkbox"/><br>BRAND (3) | YES....1<br>NO .....2<br>DK.....8<br><br><input type="checkbox"/><br>BRAND (1)<br><br><input type="checkbox"/><br>BRAND (2)<br><br><input type="checkbox"/><br>BRAND (3)                        | RECORD DAYS:<br><br>[ ][ ][ ][ ]<br>BRAND (1)<br>Don't know...998<br><br>[ ][ ][ ][ ]<br>BRAND (2)<br>Don't know...998<br><br>[ ][ ][ ][ ]<br>BRAND (3)<br>Don't know...998 | YES....1<br>NO .....2<br>DK.....8<br><br><input type="checkbox"/><br>BRAND (1)<br><br><input type="checkbox"/><br>BRAND (2)<br><br><input type="checkbox"/><br>BRAND (3)                                 | RECORD DAYS:<br><br>[ ][ ][ ][ ]<br>BRAND (1)<br>Don't know...98<br><br>[ ][ ][ ][ ]<br>BRAND (2)<br>Don't know...98<br><br>[ ][ ][ ][ ]<br>BRAND (3)<br>Don't know...98 |

| CONTRA-<br>CEPTIVE<br><br>(ASK FOR<br>MOST<br>POPULAR<br>BRANDS) | Q22a. Does<br>this<br>pharmacy<br>usually sell<br>the following<br>FP<br>methods? | Q22b. What brands do you<br>usually stock?<br><b>LIST ALL BRAND<br/>NAMES USUALLY<br/>STOCKED, EVEN IF<br/>CURRENTLY OUT OF<br/>STOCK. IF THERE ARE<br/>MORE THAN 3 BRANDS,<br/>LIST THE 3 MOST<br/>POPULAR BRANDS</b><br>(CODING WILL BE DONE<br>IN THE OFFICE). | Q22c. What is<br>the retail price<br>(in Naira) for<br><br>[PRODUCT/<br>BRAND]?                                                        | Q22d. What is<br>the average<br>retail sales<br>volume in a<br>month?                                                                    | Q22e. Is<br><br>[PRODUCT/<br>BRAND]<br>currently<br>available?                                                                                               | Q22f. Has _____<br>[PRODUCT/<br>BRAND] been<br>stocked out in this<br>store for at least 24<br>hours in the last<br><b>ONE</b> year?<br><b>IF NO OR DON'T<br/>KNOW, SKIP TO<br/>NEXT BRAND.</b> | Q22g. In the<br>past one year, for<br>how many total<br>days were you<br>stocked out of<br><br>[PRODUCT/<br>BRAND] (all<br>stock-outs<br>combined)?                                                                                                                                                                               | Q22h. Has _____<br>[PRODUCT/<br>BRAND] been<br>stocked out for at<br>least 24 hours in<br>the last <b>ONE</b><br>month (30 days)?<br><b>IF NO OR DON'T<br/>KNOW, SKIP TO<br/>NEXT BRAND/<br/>METHOD.</b> | Q22i. In the last<br>30 days, for how<br>many total days<br>were you stocked<br>out of _____<br>[PRODUCT/<br>BRAND] (all stock-<br>outs combined)?                                                                                                              |
|------------------------------------------------------------------|-----------------------------------------------------------------------------------|-------------------------------------------------------------------------------------------------------------------------------------------------------------------------------------------------------------------------------------------------------------------|----------------------------------------------------------------------------------------------------------------------------------------|------------------------------------------------------------------------------------------------------------------------------------------|--------------------------------------------------------------------------------------------------------------------------------------------------------------|-------------------------------------------------------------------------------------------------------------------------------------------------------------------------------------------------|-----------------------------------------------------------------------------------------------------------------------------------------------------------------------------------------------------------------------------------------------------------------------------------------------------------------------------------|----------------------------------------------------------------------------------------------------------------------------------------------------------------------------------------------------------|-----------------------------------------------------------------------------------------------------------------------------------------------------------------------------------------------------------------------------------------------------------------|
| (5) Female<br>condoms                                            | YES..1<br>NO...2→(6)                                                              | <br><br>_____ [ ] [ ] [ ] [ ]<br>BRAND (1)<br><br>_____ [ ] [ ] [ ] [ ]<br>BRAND (2)<br><br>_____ [ ] [ ] [ ] [ ]<br>BRAND (3)                                                                                                                                    | RETAIL PRICE<br>PER PIECE:<br><br>[ ] [ ] [ ] [ ]<br>BRAND (1)<br><br>[ ] [ ] [ ] [ ]<br>BRAND (2)<br><br>[ ] [ ] [ ] [ ]<br>BRAND (3) | SALES<br>VOLUME<br>(PIECES):<br><br>[ ] [ ] [ ] [ ]<br>BRAND (1)<br><br>[ ] [ ] [ ] [ ]<br>BRAND (2)<br><br>[ ] [ ] [ ] [ ]<br>BRAND (3) | YES . .1<br>NO .....2<br><br><input type="checkbox"/><br>BRAND (1)<br><br><input type="checkbox"/><br>BRAND (2)<br><br><input type="checkbox"/><br>BRAND (3) | YES....1<br>NO .....2<br>DK.....8<br><br><input type="checkbox"/><br>BRAND (1)<br><br><input type="checkbox"/><br>BRAND (2)<br><br><input type="checkbox"/><br>BRAND (3)                        | RECORD DAYS:<br><br><input type="text"/> <input type="text"/> <input type="text"/><br>BRAND (1)<br>Don't know...998<br><br><input type="text"/> <input type="text"/> <input type="text"/><br>BRAND (2)<br>Don't know...998<br><br><input type="text"/> <input type="text"/> <input type="text"/><br>BRAND (3)<br>Don't know...998 | YES....1<br>NO .....2<br>DK.....8<br><br><input type="checkbox"/><br>BRAND (1)<br><br><input type="checkbox"/><br>BRAND (2)<br><br><input type="checkbox"/><br>BRAND (3)                                 | RECORD DAYS:<br><br><input type="text"/> <input type="text"/><br>BRAND (1)<br>Don't know...98<br><br><input type="text"/> <input type="text"/><br>BRAND (2)<br>Don't know...98<br><br><input type="text"/> <input type="text"/><br>BRAND (3)<br>Don't know...98 |
| (6) Spermicid<br>e (foam,<br>foaming<br>tablets,<br>gel)         | YES..1<br>NO...2→(7)                                                              | <br><br>_____ [ ] [ ] [ ] [ ]<br>BRAND (1)<br><br>_____ [ ] [ ] [ ] [ ]<br>BRAND (2)<br><br>_____ [ ] [ ] [ ] [ ]<br>BRAND (3)                                                                                                                                    | RETAIL PRICE<br>PER UNIT:<br><br>[ ] [ ] [ ] [ ]<br>BRAND (1)<br><br>[ ] [ ] [ ] [ ]<br>BRAND (2)<br><br>[ ] [ ] [ ] [ ]<br>BRAND (3)  | SALES<br>VOLUME<br>(UNITS):<br><br>[ ] [ ] [ ] [ ]<br>BRAND (1)<br><br>[ ] [ ] [ ] [ ]<br>BRAND (2)<br><br>[ ] [ ] [ ] [ ]<br>BRAND (3)  | YES . .1<br>NO .....2<br><br><input type="checkbox"/><br>BRAND (1)<br><br><input type="checkbox"/><br>BRAND (2)<br><br><input type="checkbox"/><br>BRAND (3) | YES....1<br>NO .....2<br>DK.....8<br><br><input type="checkbox"/><br>BRAND (1)<br><br><input type="checkbox"/><br>BRAND (2)<br><br><input type="checkbox"/><br>BRAND (3)                        | RECORD DAYS:<br><br><input type="text"/> <input type="text"/> <input type="text"/><br>BRAND (1)<br>Don't know...998<br><br><input type="text"/> <input type="text"/> <input type="text"/><br>BRAND (2)<br>Don't know...998<br><br><input type="text"/> <input type="text"/> <input type="text"/><br>BRAND (3)<br>Don't know...998 | YES....1<br>NO .....2<br>DK.....8<br><br><input type="checkbox"/><br>BRAND (1)<br><br><input type="checkbox"/><br>BRAND (2)<br><br><input type="checkbox"/><br>BRAND (3)                                 | RECORD DAYS:<br><br><input type="text"/> <input type="text"/><br>BRAND (1)<br>Don't know...98<br><br><input type="text"/> <input type="text"/><br>BRAND (2)<br>Don't know...98<br><br><input type="text"/> <input type="text"/><br>BRAND (3)<br>Don't know...98 |

| CONTRA-<br>CEPTIVE<br><br>(ASK FOR<br>MOST<br>POPULAR<br>BRANDS) | Q22a. Does<br>this<br>pharmacy<br>usually sell<br>the following<br>FP<br>methods? | Q22b. What brands do you<br>usually stock?<br><b>LIST ALL BRAND<br/>NAMES USUALLY<br/>STOCKED, EVEN IF<br/>CURRENTLY OUT OF<br/>STOCK. IF THERE ARE<br/>MORE THAN 3 BRANDS,<br/>LIST THE 3 MOST<br/>POPULAR BRANDS</b><br>(CODING WILL BE DONE<br>IN THE OFFICE). | Q22c. What is<br>the retail price<br>(in Naira) for<br>_____<br>[PRODUCT/<br>BRAND]?                                                  | Q22d. What is<br>the average<br>retail sales<br>volume in a<br>month?                                                             | Q22e. Is<br>_____<br>[PRODUCT/<br>BRAND]<br>currently<br>available?                                                                                          | Q22f. Has _____<br>[PRODUCT/<br>BRAND] been<br>stocked out in this<br>store for at least 24<br>hours in the last<br><b>ONE</b> year?<br><b>IF NO OR DON'T<br/>KNOW, SKIP TO<br/>NEXT BRAND.</b> | Q22g. In the<br>past one year, for<br>how many total<br>days were you<br>stocked out of<br>_____<br>[PRODUCT/<br>BRAND] (all<br>stock-outs<br>combined)?           | Q22h. Has _____<br>[PRODUCT/<br>BRAND] been<br>stocked out for at<br>least 24 hours in<br>the last <b>ONE</b><br>month (30 days)?<br><b>IF NO OR DON'T<br/>KNOW, SKIP TO<br/>NEXT BRAND/<br/>METHOD.</b> | Q22i. In the last<br>30 days, for how<br>many total days<br>were you stocked<br>out of _____<br>[PRODUCT/<br>BRAND] (all stock-<br>outs combined)?     |
|------------------------------------------------------------------|-----------------------------------------------------------------------------------|-------------------------------------------------------------------------------------------------------------------------------------------------------------------------------------------------------------------------------------------------------------------|---------------------------------------------------------------------------------------------------------------------------------------|-----------------------------------------------------------------------------------------------------------------------------------|--------------------------------------------------------------------------------------------------------------------------------------------------------------|-------------------------------------------------------------------------------------------------------------------------------------------------------------------------------------------------|--------------------------------------------------------------------------------------------------------------------------------------------------------------------|----------------------------------------------------------------------------------------------------------------------------------------------------------------------------------------------------------|--------------------------------------------------------------------------------------------------------------------------------------------------------|
| (7) Injectables (Depo, Noristerat)                               | YES..1<br>NO...2→(8)                                                              | <br>_____<br>BRAND (1) [ ][ ][ ][ ]<br><br>_____<br>BRAND (2) [ ][ ][ ][ ]<br><br>_____<br>BRAND (3) [ ][ ][ ][ ]                                                                                                                                                 | RETAIL PRICE<br>PER<br>INJECTABLE:<br><br>[ ][ ][ ][ ]<br>BRAND (1)<br><br>[ ][ ][ ][ ]<br>BRAND (2)<br><br>[ ][ ][ ][ ]<br>BRAND (3) | SALES<br>VOLUME<br>(INJECTS)<br><br>[ ][ ][ ][ ]<br>BRAND (1)<br><br>[ ][ ][ ][ ]<br>BRAND (2)<br><br>[ ][ ][ ][ ]<br>BRAND (3)   | YES . .1<br>NO .....2<br><br><input type="checkbox"/><br>BRAND (1)<br><br><input type="checkbox"/><br>BRAND (2)<br><br><input type="checkbox"/><br>BRAND (3) | YES....1<br>NO .....2<br>DK.....8<br><br><input type="checkbox"/><br>BRAND (1)<br><br><input type="checkbox"/><br>BRAND (2)<br><br><input type="checkbox"/><br>BRAND (3)                        | RECORD DAYS:<br><br>[ ][ ][ ]<br>BRAND (1)<br>Don't know...998<br><br>[ ][ ][ ]<br>BRAND (2)<br>Don't know...998<br><br>[ ][ ][ ]<br>BRAND (3)<br>Don't know...998 | YES....1<br>NO .....2<br>DK.....8<br><br><input type="checkbox"/><br>BRAND (1)<br><br><input type="checkbox"/><br>BRAND (2)<br><br><input type="checkbox"/><br>BRAND (3)                                 | RECORD DAYS:<br><br>[ ][ ]<br>BRAND (1)<br>Don't know...98<br><br>[ ][ ]<br>BRAND (2)<br>Don't know...98<br><br>[ ][ ]<br>BRAND (3)<br>Don't know...98 |
| (8) Implant (e.g. Implanon or Jadelle)                           | YES..1<br>NO...2→<br>(Q23a)                                                       | <br>_____<br>BRAND (1) [ ][ ][ ][ ]<br><br>_____<br>BRAND (2) [ ][ ][ ][ ]<br><br>_____<br>BRAND (3) [ ][ ][ ][ ]                                                                                                                                                 | RETAIL PRICE<br>PER IMPLANT:<br><br>[ ][ ][ ][ ]<br>BRAND (1)<br><br>[ ][ ][ ][ ]<br>BRAND (2)<br><br>[ ][ ][ ][ ]<br>BRAND (3)       | SALES<br>VOLUME<br>(IMPLANTS):<br><br>[ ][ ][ ][ ]<br>BRAND (1)<br><br>[ ][ ][ ][ ]<br>BRAND (2)<br><br>[ ][ ][ ][ ]<br>BRAND (3) | YES . .1<br>NO .....2<br><br><input type="checkbox"/><br>BRAND (1)<br><br><input type="checkbox"/><br>BRAND (2)<br><br><input type="checkbox"/><br>BRAND (3) | YES....1<br>NO .....2<br>DK.....8<br><br><input type="checkbox"/><br>BRAND (1)<br><br><input type="checkbox"/><br>BRAND (2)<br><br><input type="checkbox"/><br>BRAND (3)                        | RECORD DAYS:<br><br>[ ][ ][ ]<br>BRAND (1)<br>Don't know...998<br><br>[ ][ ][ ]<br>BRAND (2)<br>Don't know...998<br><br>[ ][ ][ ]<br>BRAND (3)<br>Don't know...998 | YES....1<br>NO .....2<br>DK.....8<br><br><input type="checkbox"/><br>BRAND (1)<br><br><input type="checkbox"/><br>BRAND (2)<br><br><input type="checkbox"/><br>BRAND (3)                                 | RECORD DAYS:<br><br>[ ][ ]<br>BRAND (1)<br>Don't know...98<br><br>[ ][ ]<br>BRAND (2)<br>Don't know...98<br><br>[ ][ ]<br>BRAND (3)<br>Don't know...98 |

Now I would like to ask you about your specific stocks of different family planning methods/products.  
**ONLY ASK ABOUT THOSE METHODS THAT ARE AVAILABLE FROM Q22a.**

| CONTRACEPTIVE                                                 | Q23a. Where does your stock of CONTRACEPTIVE (most popular brands) come from? CHOOSE ALL.                                                              | Q23b. On average, how long does it take to receive your supplies after you have placed an order? READ LIST.                                                  |
|---------------------------------------------------------------|--------------------------------------------------------------------------------------------------------------------------------------------------------|--------------------------------------------------------------------------------------------------------------------------------------------------------------|
| (01) Combination oral contraceptives (estrogen and progestin) | Government..... A<br>Intl NGO ..... B<br>Local NGO..... C<br>Pharmacy wholesaler/distributor..... D<br>Other _____ X<br>(Specify)<br>Don't know..... Z | One week or less..... 1<br>Between 2-4 weeks.... 2<br>Between 5-8 weeks.... 3<br>More than 8 weeks.... 4<br>Other _____ 6<br>(Specify)<br>Don't know ..... 8 |
| (02) Progestin-only oral contraceptives                       | Government..... A<br>Intl NGO ..... B<br>Local NGO..... C<br>Pharmacy wholesaler/distributor..... D<br>Other _____ X<br>(Specify)<br>Don't know..... Z | One week or less..... 1<br>Between 2-4 weeks.... 2<br>Between 5-8 weeks.... 3<br>More than 8 weeks.... 4<br>Other _____ 6<br>(Specify)<br>Don't know ..... 8 |
| (03) Emergency contraceptives                                 | Government..... A<br>Intl NGO ..... B<br>Local NGO..... C<br>Pharmacy wholesaler/distributor..... D<br>Other _____ X<br>(Specify)<br>Don't know..... Z | One week or less..... 1<br>Between 2-4 weeks.... 2<br>Between 5-8 weeks.... 3<br>More than 8 weeks.... 4<br>Other _____ 6<br>(Specify)<br>Don't know ..... 8 |
| (04) Male condoms                                             | Government..... A<br>Intl NGO ..... B<br>Local NGO..... C<br>Pharmacy wholesaler/distributor..... D<br>Other _____ X<br>(Specify)<br>Don't know..... Z | One week or less..... 1<br>Between 2-4 weeks.... 2<br>Between 5-8 weeks.... 3<br>More than 8 weeks.... 4<br>Other _____ 6<br>(Specify)<br>Don't know ..... 8 |
| (05) Female condoms                                           | Government..... A<br>Intl NGO ..... B<br>Local NGO..... C<br>Pharmacy wholesaler/distributor..... D<br>Other _____ X<br>(Specify)<br>Don't know..... Z | One week or less..... 1<br>Between 2-4 weeks.... 2<br>Between 5-8 weeks.... 3<br>More than 8 weeks.... 4<br>Other _____ 6<br>(Specify)<br>Don't know ..... 8 |
| (06) Spermicide                                               | Government..... A<br>Intl NGO ..... B<br>Local NGO..... C<br>Pharmacy wholesaler/distributor..... D<br>Other _____ X<br>(Specify)<br>Don't know..... Z | One week or less..... 1<br>Between 2-4 weeks.... 2<br>Between 5-8 weeks.... 3<br>More than 8 weeks.... 4<br>Other _____ 6<br>(Specify)<br>Don't know ..... 8 |
| (07) Injectables (e.g., Depo Provera, Noristerat)             | Government..... A<br>Intl NGO ..... B<br>Local NGO..... C<br>Pharmacy wholesaler/distributor..... D<br>Other _____ X<br>(Specify)<br>Don't know..... Z | One week or less..... 1<br>Between 2-4 weeks.... 2<br>Between 5-8 weeks.... 3<br>More than 8 weeks.... 4<br>Other _____ 6<br>(Specify)<br>Don't know ..... 8 |
| (08) Implant (Norplant)                                       | Government..... A<br>Intl NGO ..... B<br>Local NGO..... C<br>Pharmacy wholesaler/distributor..... D<br>Other _____ X<br>(Specify)<br>Don't know..... Z | One week or less..... 1<br>Between 2-4 weeks.... 2<br>Between 5-8 weeks.... 3<br>More than 8 weeks.... 4<br>Other _____ 6<br>(Specify)<br>Don't know ..... 8 |



|      |                                                                                                                                                                                                                                                                                                                                                                                                                                             |                                                                                                                                                                                                                  |                                                                         |
|------|---------------------------------------------------------------------------------------------------------------------------------------------------------------------------------------------------------------------------------------------------------------------------------------------------------------------------------------------------------------------------------------------------------------------------------------------|------------------------------------------------------------------------------------------------------------------------------------------------------------------------------------------------------------------|-------------------------------------------------------------------------|
| Q24. | <p>If there is a shortage of a specific CONTRACEPTIVE between routine orders, what is the <u>most common</u> procedure followed by this pharmacy?</p> <ul style="list-style-type: none"> <li>- Submit special order to normal supplier</li> <li>- Pharmacy purchases from private market</li> <li>- Clients must purchase from another outlet</li> <li>- Facility borrows from neighboring Pharmacy</li> <li>- None of the above</li> </ul> | <p>SPECIAL ORDER . . . . .1      →</p> <p>PHARMACY PURCHASE . . . . . 2      →</p> <p>CLIENTS PURCHASE ELSEWHERE. . .3      →</p> <p>PHARMACY BORROWS . . . . . 4</p> <p>NONE OF THE ABOVE . . . . .5      →</p> | <p><b>Q26</b></p> <p><b>Q26</b></p> <p><b>Q26</b></p> <p><b>Q26</b></p> |
| Q25. | When you borrow supplies, from what outlet do you most often borrow?                                                                                                                                                                                                                                                                                                                                                                        | NAME: _____                                                                                                                                                                                                      |                                                                         |
| Q26. | From which type of outlet do you borrow supplies?                                                                                                                                                                                                                                                                                                                                                                                           | <p>Government.....1</p> <p>Private (for-profit).....2</p> <p>NGO (not-for profit).....3</p> <p>Mission.....4</p> <p>Other _____ 6</p> <p style="text-align: center;">(Specify)</p>                               |                                                                         |

**ASK ONLY ABOUT THE FAMILY PLANNING METHODS THE PHARMACY IS PROVIDING IN Q22a.**

*Now I would like to ask you specifically about the contraceptive methods that you provide.*

| CONTRACEPTIVE                                                | Q27a. What is the minimum age that you would offer this METHOD? | Q27b. What is the maximum age that you would offer this METHOD? | Q27c. Is there a minimum number of children a person must have before you will offer METHOD? | Q27d. What is that minimum number of children? | Q27e. Do you require a partner's consent before you will provide METHOD? | Q27f. Would you offer METHOD to an unmarried person? | Q27g. Do you require a prescription for a client to receive this METHOD? |
|--------------------------------------------------------------|-----------------------------------------------------------------|-----------------------------------------------------------------|----------------------------------------------------------------------------------------------|------------------------------------------------|--------------------------------------------------------------------------|------------------------------------------------------|--------------------------------------------------------------------------|
| (1) Combination oral contraceptives (estrogen and progestin) | <input type="text"/><br>NO MIN...93<br>DK.....98                | <input type="text"/><br>NO MAX...93<br>DK.....98                | YES ... 1<br>NO ... 2 → Q27e<br>DK.....8 → Q27e                                              | <input type="text"/>                           | YES ... .1<br>NO ... .2                                                  | YES ... .1<br>NO ... .2                              | YES ... .1<br>NO ... .2                                                  |
| (2) Progestin-only oral contraceptives                       | <input type="text"/><br>NO MIN...93<br>DK.....98                | <input type="text"/><br>NO MAX...93<br>DK.....98                | YES ... 1<br>NO ... 2 → Q27e<br>DK.....8 → Q27e                                              | <input type="text"/>                           | YES ... .1<br>NO ... .2                                                  | YES ... .1<br>NO ... .2                              | YES ... .1<br>NO ... .2                                                  |
| (3) Emergency contraceptives                                 | <input type="text"/><br>NO MIN...93<br>DK.....98                | <input type="text"/><br>NO MAX...93<br>DK.....98                | YES ... 1<br>NO ... 2 → Q27e<br>DK.....8 → Q27e                                              | <input type="text"/>                           | YES ... .1<br>NO ... .2                                                  | YES ... .1<br>NO ... .2                              | YES ... .1<br>NO ... .2                                                  |
| (4) Male condoms                                             | <input type="text"/><br>NO MIN...93<br>DK.....98                | <input type="text"/><br>NO MAX...93<br>DK.....98                | YES ... 1<br>NO ... 2 → Q27e<br>DK.....8 → Q27e                                              | <input type="text"/>                           | YES ... .1<br>NO ... .2                                                  | YES ... .1<br>NO ... .2                              | YES ... .1<br>NO ... .2                                                  |
| (5) Female condoms                                           | <input type="text"/><br>NO MIN...93<br>DK.....98                | <input type="text"/><br>NO MAX...93<br>DK.....98                | YES ... 1<br>NO ... 2 → Q27e<br>DK.....8 → Q27e                                              | <input type="text"/>                           | YES ... .1<br>NO ... .2                                                  | YES ... .1<br>NO ... .2                              | YES ... .1<br>NO ... .2                                                  |
| (6) Spermicide (foam, foaming tablets, gel)                  | <input type="text"/><br>NO MIN...93<br>DK.....98                | <input type="text"/><br>NO MAX...93<br>DK.....98                | YES ... 1<br>NO ... 2 → Q27e<br>DK.....8 → Q27e                                              | <input type="text"/>                           | YES ... .1<br>NO ... .2                                                  | YES ... .1<br>NO ... .2                              | YES ... .1<br>NO ... .2                                                  |
| (7) Injectables (e.g. Depo Provera/ DMPA)                    | <input type="text"/><br>NO MIN...93<br>DK.....98                | <input type="text"/><br>NO MAX...93<br>DK.....98                | YES ... 1<br>NO ... 2 → Q27e<br>DK.....8 → Q27e                                              | <input type="text"/>                           | YES ... .1<br>NO ... .2                                                  | YES ... .1<br>NO ... .2                              | YES ... .1<br>NO ... .2                                                  |
| (8) Implant (e.g. Implanon or Jadelle)                       | <input type="text"/><br>NO MIN...93<br>DK.....98                | <input type="text"/><br>NO MAX...93<br>DK.....98                | YES ... 1<br>NO ... 2 → Q27e<br>DK.....8 → Q27e                                              | <input type="text"/>                           | YES ... .1<br>NO ... .2                                                  | YES ... .1<br>NO ... .2                              | YES ... .1<br>NO ... .2                                                  |

|                                                                                                                                                                                                                                                                                                                          |                                                                                                                                                                                                                                                                                                      |                                                                                                                                                                                                              |            |
|--------------------------------------------------------------------------------------------------------------------------------------------------------------------------------------------------------------------------------------------------------------------------------------------------------------------------|------------------------------------------------------------------------------------------------------------------------------------------------------------------------------------------------------------------------------------------------------------------------------------------------------|--------------------------------------------------------------------------------------------------------------------------------------------------------------------------------------------------------------|------------|
| Q28.                                                                                                                                                                                                                                                                                                                     | Is this pharmacy linked with any organization that provides family planning methods and materials at a discounted rate or for free (such as PPFN or SFH)?                                                                                                                                            | Yes.....1<br>No.....2<br>Don't know.....8                                                                                                                                                                    | Q30<br>Q30 |
| Q29a.                                                                                                                                                                                                                                                                                                                    | What is the name of the organization?                                                                                                                                                                                                                                                                | Q29b What year did this facility begin to associate with each organization named?                                                                                                                            |            |
|                                                                                                                                                                                                                                                                                                                          | 1.                                                                                                                                                                                                                                                                                                   | Year .....<br>Don't know ..... 9998                                                                                                                                                                          |            |
|                                                                                                                                                                                                                                                                                                                          | 2.                                                                                                                                                                                                                                                                                                   | Year .....<br>Don't know ..... 9998                                                                                                                                                                          |            |
|                                                                                                                                                                                                                                                                                                                          | 3.                                                                                                                                                                                                                                                                                                   | Year .....<br>Don't know ..... 9998                                                                                                                                                                          |            |
|                                                                                                                                                                                                                                                                                                                          | 4.                                                                                                                                                                                                                                                                                                   | Year .....<br>Don't know ..... 9998                                                                                                                                                                          |            |
| Q30.                                                                                                                                                                                                                                                                                                                     | Organizations like SFH and PPFN sometimes distribute products at a lower price to pharmacies to sell. These are called socially marketed products.<br>Do you have socially marketed contraceptive products in stock?                                                                                 | Yes ..... 1<br>No ..... 2<br>Don't know ..... 8                                                                                                                                                              | Q32<br>Q32 |
| Q31.                                                                                                                                                                                                                                                                                                                     | What are all the socially marketed family planning products that you have in stock? <b>LIST SPECIFIC FAMILY PLANNING BRAND NAMES.</b><br><br><b>(CODE WILL BE PROVIDED AT THE OFFICE)</b>                                                                                                            | _____<br>_____<br>_____                                                                                                                                                                                      |            |
| <b>STORAGE &amp; STOCK:</b> Now I would like to see the place where contraceptive methods are stored. We are just trying to get an idea of how we can help outlets improve their stocking and storing methods. Remember that my findings will be just used for research purposes and will be kept strictly confidential. |                                                                                                                                                                                                                                                                                                      |                                                                                                                                                                                                              |            |
| Q32.                                                                                                                                                                                                                                                                                                                     | OBSERVE WHETHER ALL THE CONTRACEPTIVE METHODS ARE PROTECTED FROM WATER OR DAMPNES                                                                                                                                                                                                                    | YES ..... 1<br>NO ..... 2<br>CANNOT OBSERVE STORAGE AREA.....3                                                                                                                                               | Q38        |
| Q33.                                                                                                                                                                                                                                                                                                                     | OBSERVE WHETHER ALL THE CONTRACEPTIVE METHODS ARE OFF THE FLOOR                                                                                                                                                                                                                                      | YES ..... 1<br>NO ..... 2                                                                                                                                                                                    |            |
| Q34.                                                                                                                                                                                                                                                                                                                     | OBSERVE WHETHER THE CEILING ABOVE THE CONTRACEPTIVE METHODS IS INTACT AND NOT LEAKING                                                                                                                                                                                                                | YES ..... 1<br>NO ..... 2                                                                                                                                                                                    |            |
| Q35.                                                                                                                                                                                                                                                                                                                     | OBSERVE WHETHER ALL THE CONTRACEPTIVE METHODS ARE PROTECTED FROM THE SUN.                                                                                                                                                                                                                            | YES ..... 1<br>NO ..... 2                                                                                                                                                                                    |            |
| Q36.                                                                                                                                                                                                                                                                                                                     | OBSERVE WHETHER THE ROOM IS CLEAN OF EVIDENCE OF RODENTS (BATS, RATS) OR PESTS (ROACHES, ETC).                                                                                                                                                                                                       | YES ..... 1<br>NO ..... 2                                                                                                                                                                                    |            |
| Q37.                                                                                                                                                                                                                                                                                                                     | OBSERVE WHETHER THE INJECTABLES ARE STORED UPRIGHT.                                                                                                                                                                                                                                                  | YES ..... 1<br>NO ..... 2<br>NOT APPLICABLE/DON'T PROVIDE INJECTABLES.....7                                                                                                                                  |            |
| Q38.                                                                                                                                                                                                                                                                                                                     | Does the pharmacy separate damaged and/or expired family planning methods from the usable products, and remove them from the inventory?<br><br>IF YES, ASK TO SEE EVIDENCE OF EACH OF THE INDICATED PRACTICES AND ALL THAT WERE OBSERVED. ALSO ASK FOR THE TALLY CARD TO CHECK FOR RECORDED BALANCE. | YES, DAMAGED/EXPIRED ITEM REMOVED FROM INVENTORY ..... 1<br>REMOVED FROM SHELVES AND NO EXPIRED ITEMS PRESENT..... 2<br>EXPIRED ITEMS OBSERVED ..... 3<br>REPORTED YES BUT CANNOT OBSERVE....4<br>NO ..... 5 |            |

|      |                                                                                      |                                                                                                                                                                                                                       |  |
|------|--------------------------------------------------------------------------------------|-----------------------------------------------------------------------------------------------------------------------------------------------------------------------------------------------------------------------|--|
| Q39. | OBSERVE WHETHER THERE IS A FUNCTIONAL REFRIGERATOR IN THE SHOP FOR STORING MEDICINES | YES, OBSERVED REFRIGERATOR AND FUNCTIONAL.....1<br>YES, OBSERVED REFRIGERATOR BUT NOT FUNCTIONAL OR NOT USED FOR STORING MEDICINES.....2<br>YES, BUT REFRIGERATOR NOT OBSERVED.....3<br>NO REFRIGERATOR PRESENT.....5 |  |
|------|--------------------------------------------------------------------------------------|-----------------------------------------------------------------------------------------------------------------------------------------------------------------------------------------------------------------------|--|

|      |                 |                                                      |                                                         |
|------|-----------------|------------------------------------------------------|---------------------------------------------------------|
| Q40. | RECORD THE TIME | Hour ..... <input type="text"/> <input type="text"/> | Minutes ..... <input type="text"/> <input type="text"/> |
|------|-----------------|------------------------------------------------------|---------------------------------------------------------|

Thank you very much for taking the time to answer my questions. Once again, any information you have given will be kept confidential. Have a good day!

COMMENTS:
